# Supplementary material
Source: PubMed Central journal article supplement (PMC3678731)

**Integrated genomic analyses identify WEE1 as a critical mediator of cell fate and novel therapeutic target in acute myeloid leukemia**

**Christopher C. Porter, Jihye Kim, Susan Fosmire, Christy M. Gearheart, Annemie van Linden, Dmitry Baturin, Vadym Zaberezhnyy, Purvi R. Patel, Dexiang Gao, Aik Choon Tan, James DeGregori**

**Supplemental Information**

**Contents:**

**Supplemental Methods**

**Supplemental Table 1 - Genes Identified by BINGS as mediators of AML cell fate in cytarabine**

**Supplemental Table 2 - Genes Identified by RFC as mediators of AML cell fate in cytarabine**

**Supplemental Table 3 - Mediators of AML cell fate in cytarabine (BINGS RFC overlap)**

**Supplemental Table 4 - Top Molecular and Cellular Function from Functional Genetic Screening - Cell cycle**

**Supplemental Table 5 - Differentially expressed genes in AML cells exposed to cytarabine**

**Supplemental Figure 1 - Top Molecular and biological functions represented by top differentially expressed genes exposed to ARA-C**

**Supplemental Figure 2 - Pharmacologic inhibition of WEE1.**

**Supplemental Figure 3 - Cell cycle analyses**

**Supplemental Figure 4 - Inhibition of WEE1 sensitizes primary AML cells to cytarabine.**

## Supplemental Methods:

### Genome-wide functional genetic screening:

Total RNA was harvested and reverse transcribed using the vector specific, cDNA Synthesis GNH primer supplied by SBI. The cDNA was amplified by PCR using vector specific, Fwd and Rev GNH primers supplied by SBI. The amplicon was amplified again by nested PCR using vector specific primers customized to include Illumina specific sequences (GNH-ISS). The QIAquick PCR Purification kit (QIAGEN, Valencia, CA) was used to clean up DNA which was then quantified using a 2100 Bioanalyzer (Agilent, Foster City, CA), and diluted to 10nM in EB (QIAGEN) for sequencing. One and one-half pMol was processed on the Genome Analyzer<sub>II</sub> according to the manufacturer's recommendations using a customized sequencing primer (CSP-GNH;

### Supplemental Methods Table 1).

Image data generated by the IGA was initially processed for base-calling, quality analysis and quantification using the software provided by Illumina. The library of shRNA tags from the genome-wide pool was created by mapping sequence output to the human reference genome (RefSeq GRch37, hg19) by Bowtie [1]. We developed and implemented an innovative solution, for analyzing and interpreting functional genetic screens quantified by deep sequencing (Kim et al, In preparation). We devised a general analytical pipeline that consists of five analytical steps – Preprocessing, Mapping, Statistical Analysis, Post-analysis and Functional analysis. In brief, the preprocessing step filtered out erroneous and low quality reads. Next, we mapped the reads that passed the filtering step against the shRNA reference library using Bowtie. The output from this step is a  $P \times N$  matrix, where  $P$  and  $N$  represents the shRNA counts and samples, respectively. We performed secondary filtering step to remove shRNA reads that mapped to sequences that have no gene annotations.

For the BINGS analyses we also filtered out shRNAs where the median raw count in the control group is greater than the maximum raw count in the treatment group if the shRNA is enriched in the control group, and vice versa. This filtering step eliminates shRNA tags for which there is high variability in counts, potentially eliminating false positives. After this secondary filtering step, we use a Negative Binomial as the statistical model in our pipeline to model the count distribution in the NGS data using edgeR [2]. We also compute the q-value of FDR (false discovery rate) for multiple comparisons for these shRNAs [3]. In the post-analysis step, we performed meta-analysis by combining p-values of all the shRNAs representing the same gene using a weighted Z-transformation method that puts more weight to the small-adjusted p-value shRNAs [4]. Using this method, we can collapse multiple shRNAs into genes, with an associated p-value ( $P(wZ)$ ).

For the RFC analyses we filtered out shRNA tags for which there were not at least 2 replicates of the same condition with read counts  $\geq 1$ . Data were then adjusted for 0 counts by adding 1 to all counts and normalized to the total number of counts per lane. The fold change was calculated as a ratio of the mean tag count of treated divided by that for untreated (i.e. ARA-C/UT). For values less than 1, the negative reciprocal was calculated such that shRNA tags under-represented in cytarabine have negative values. We defined hits as genes with  $>1$  shRNA tag differentially represented by at least 3-fold.

**Targeted high-throughput validation:** Targeted libraries were created using the known sequences of the included shRNAs from TRC. Bowtie was used to align sequence output to these libraries. Barcoded adapters were prepared by dissolving paired SS oligonucleotides in 10mM Tris pH8.0, 50mM NaCl to 200 $\mu$ M, mixing 1:1 for final concentration of 100 $\mu$ M, heating to 94 $^{\circ}$ , cooling at room temperature overnight, and desalting using Illustra Micro-Spin G25 columns (GE Healthcare, Piscataway, NJ) at 4 $^{\circ}$ . Genomic DNA was isolated using DNeasy Blood & Tissue Kit (QIAGEN) and shRNA coding sequences were amplified using vector specific primers (pLKO.1-Fwd and -Rev; Supplementary Table 2). The amplicon was restriction enzyme digested with XhoI (Fermentas) followed by clean up using the QIAEX II Gel Extraction kit (QIAGEN). One barcoded adapter

was ligated to each replicate. The pooled, barcoded samples were then amplified using primers with Illumina specific sequences and specific to the vector and adapter sequences (nFwd- and nRev- pLKO.1-ISS; **Supplemental Methods Table 2**). The PCR product was purified using the QIAquick PCR Purification kit, diluted to 10nM in EB, and processed on the Genome Analyzer<sub>ii</sub> according to the manufacturer's recommendations using a customized sequencing primer (CSP-pLKO.1; **Supplemental Methods Table 2**).

Data were pre-processed as for the genome-wide screen with the addition of a parsing mechanism to identify replicates according to the barcode. Data were then analyzed in edgeR. Genes were considered validated if 1 of 2 shRNAs or if 2 of 3 or more shRNAs were statistically significantly differentially represented in the expected direction. A p-value of 0.1 was used to identify statistically significant differences.

**Supplemental Methods Table 1. Primers for Large Scale FGS using SBI GeneNet 50K (pSIH1)**

|                    |                                                                          |
|--------------------|--------------------------------------------------------------------------|
| cDNA Synthesis GNH | 5'-ACACACTACTTGAAGCACTCAAGGCAA-3'                                        |
| Fwd-GNH            | 5'-TGCATGTCGCTATGTGTTCTGGGA-3'                                           |
| Rev-GNH            | 5'-CTCCCAGGCTCAGATCTGGTCTAA-3'                                           |
| nFwd-GNH-ISS       | 5'-CAAGCAGAAGACGGCATAACGAAGAAGCAAAAAGCAGAATCGAAGAA-3'                    |
| nRev-GNH-ISS       | 5'-<br>AATGATACGGCGACCACCGAGATCTACACTCTTTCCCTACACGACGCTTCCTGTCAGA-<br>3' |
| CSP-GNH            | 5'ACACTCTTTCCCTACACGACGCTTCCTGTCAGA-3'                                   |

**Supplemental Methods Table 2. Primers for high-throughput validation using pLKO.1**

|                 |                                                                          |
|-----------------|--------------------------------------------------------------------------|
| Fwd-pLKO.1      | 5'-CTTGTGAAAGGACGAAACACCG-3'                                             |
| Rev-pLKO.1      | 5'-CCA AAG TGG ATC TCT GCT GTC CC-3'                                     |
| nFwd-pLKO.1-ISS | 5'-CAAGCAGAAGACGGCATAACGATGGAAAGGACGAAACACCGG-3'                         |
| nRev-pLKO.1-ISS | 5'-<br>AATGATACGGCGACCACCGAGATCTACACTCTTTCCCTACACGACGCTCTTCCGATCT-<br>3' |
| CSP-pLKO.1      | 5'-ACACTCTTTCCCTACACGACGCTCTTCCGATCT-3'                                  |

1. Langmead, B., et al., *Ultrafast and memory-efficient alignment of short DNA sequences to the human genome*. Genome Biol, 2009. **10**(3): p. R25.
2. Robinson, M.D., D.J. McCarthy, and G.K. Smyth, *edgeR: a Bioconductor package for differential expression analysis of digital gene expression data*. Bioinformatics, 2010. **26**(1): p. 139-40.
3. Benjamini, Y., Hochberg, Y., *Controlling the False Discovery Rate: a Practical and Powerful Approach to Multiple Testing*. J. R. Statist. Soc. B, 1995. **57**(1): p. 289-300.
4. Whitlock, M.C., *Combining probability from independent tests: the weighted Z-method is superior to Fisher's approach*. J Evol Biol, 2005. **18**(5): p. 1368-73.

Supplemental Table 1 - Genes Identified by BINGS as mediators of AML cell fate in cytarabine

| MV4-11                                                           |           |      |           | Molm13                                                           |           |      |           |
|------------------------------------------------------------------|-----------|------|-----------|------------------------------------------------------------------|-----------|------|-----------|
| GeneSymbol                                                       | P(wZ)     | Rank | E value   | GeneSymbol                                                       | P(wZ)     | Rank | E value   |
| <b><u>Genes which confer chemosensitivity when inhibited</u></b> |           |      |           | <b><u>Genes which confer chemosensitivity when inhibited</u></b> |           |      |           |
| WEE1                                                             | 3.35E-05  | 1    | 3.35E-05  | CACNG6                                                           | 7.81E-05  | 1    | 7.81E-05  |
| REEP1                                                            | 4.93E-05  | 2    | 9.87E-05  | SPRED2                                                           | 9.98E-05  | 2    | 0.0001996 |
| HSBP1                                                            | 0.0001153 | 3    | 0.0003458 | ATF5                                                             | 0.0001317 | 3    | 0.000395  |
| FHL1                                                             | 0.0001269 | 4    | 0.0005076 | CLDN20                                                           | 0.0001332 | 4    | 0.0005326 |
| RAD17                                                            | 0.000142  | 5    | 0.0007098 | GOLGA2                                                           | 0.0001889 | 5    | 0.0009443 |
| ABCE1                                                            | 0.0001525 | 6    | 0.000915  | SMPD1                                                            | 0.0001993 | 6    | 0.001196  |
| PIP5K3                                                           | 0.0001967 | 7    | 0.0013767 | MAPK8IP3                                                         | 0.0002157 | 7    | 0.0015098 |
| TMEM87A                                                          | 0.0002234 | 8    | 0.0017872 | PTPRR                                                            | 0.0002904 | 8    | 0.0023234 |
| ACVR1B                                                           | 0.0003985 | 9    | 0.0035861 | FKBP1A                                                           | 0.0003086 | 9    | 0.0027776 |
| DLX4                                                             | 0.0006295 | 10   | 0.0062949 | KIR2DL1                                                          | 0.0003171 | 10   | 0.0031714 |
| CHAF1A                                                           | 0.0006774 | 11   | 0.0074516 | KIR2DL2                                                          | 0.0003171 | 10   | 0.0031714 |
| ANAPC5                                                           | 0.0006914 | 12   | 0.0082972 | ZFP42                                                            | 0.0003299 | 12   | 0.0039583 |
| PRKCA                                                            | 0.0007177 | 13   | 0.00933   | MED21                                                            | 0.0003642 | 13   | 0.0047349 |
| TUBB1                                                            | 0.0007223 | 14   | 0.0101119 | ZBTB7A                                                           | 0.0004109 | 14   | 0.005753  |
| ANKRD28                                                          | 0.0007749 | 15   | 0.0116234 | MFF                                                              | 0.0004296 | 15   | 0.0064446 |
| NBS                                                              | 0.0007942 | 16   | 0.0127078 | NCOA2                                                            | 0.0004434 | 16   | 0.0070938 |
| NBN                                                              | 0.0007942 | 16   | 0.0127078 | STC1                                                             | 0.0004479 | 17   | 0.007614  |
| DCLRE1B                                                          | 0.0010386 | 18   | 0.0186948 | RWDD2A                                                           | 0.0006696 | 18   | 0.0120526 |
| KRT33B                                                           | 0.0011624 | 19   | 0.0220856 | PPP3CA                                                           | 0.0008991 | 19   | 0.0170831 |
| FN1                                                              | 0.0012063 | 20   | 0.024126  | POLR2C                                                           | 0.0009127 | 20   | 0.018253  |
| CRKL                                                             | 0.0012122 | 21   | 0.0254562 | RAD18                                                            | 0.0009557 | 21   | 0.0200687 |
| FUSIP1                                                           | 0.0016807 | 22   | 0.0369754 | FHL1                                                             | 0.0010972 | 22   | 0.0241384 |
| MRPL22                                                           | 0.0017248 | 23   | 0.0396704 | PAQR6                                                            | 0.0012476 | 23   | 0.0286948 |
| CYTH3                                                            | 0.001725  | 24   | 0.0414    | MDGA2                                                            | 0.0012578 | 24   | 0.0301872 |
| FANCL                                                            | 0.0017251 | 25   | 0.0431275 | SCRN3                                                            | 0.0014162 | 25   | 0.035405  |
| CUL3                                                             | 0.0017267 | 26   | 0.0448942 | SMOX                                                             | 0.0016208 | 26   | 0.0421408 |
| PRKCQ                                                            | 0.0017293 | 27   | 0.0466911 | SFRP1                                                            | 0.0016388 | 27   | 0.0442476 |
| HUNK                                                             | 0.0017305 | 28   | 0.048454  | NPAS2                                                            | 0.0017598 | 28   | 0.0492744 |
| GORASP1                                                          | 0.0017317 | 29   | 0.0502193 | CLIC5                                                            | 0.0020308 | 29   | 0.0588932 |
| PBRM1                                                            | 0.0017331 | 30   | 0.051993  | SLC1A2                                                           | 0.0020584 | 30   | 0.061752  |
| NSUN5                                                            | 0.001735  | 31   | 0.053785  | HSP90AAA1                                                        | 0.0020617 | 31   | 0.0639127 |
| SPC25                                                            | 0.0017355 | 32   | 0.055536  | TMEM97                                                           | 0.0021573 | 32   | 0.0690336 |
| AKAP9                                                            | 0.0017366 | 33   | 0.0573078 | RRAGA                                                            | 0.0021814 | 33   | 0.0719862 |
| PDIA6                                                            | 0.0017386 | 34   | 0.0591124 | ARSD                                                             | 0.0022215 | 34   | 0.07531   |
| ATP6V1C2                                                         | 0.0017386 | 34   | 0.0591124 | ITGB8                                                            | 0.0022314 | 35   | 0.078099  |
| SPTBN1                                                           | 0.0017456 | 36   | 0.0628416 | ITGB3                                                            | 0.0022345 | 36   | 0.080442  |
| EMD                                                              | 0.0017501 | 37   | 0.0647537 | C4orf18                                                          | 0.0023632 | 37   | 0.0874384 |
| MAB21L2                                                          | 0.0017533 | 38   | 0.0666254 | HMGB2                                                            | 0.0023645 | 38   | 0.089851  |
| ACY3                                                             | 0.0017533 | 38   | 0.0666254 | COX15                                                            | 0.0023753 | 39   | 0.0926367 |
| ACTL6B                                                           | 0.0017533 | 38   | 0.0666254 | ING5                                                             | 0.0023825 | 40   | 0.0953    |
| FLJ44048                                                         | 0.0017606 | 41   | 0.0721846 | PARP10                                                           | 0.0023825 | 40   | 0.0953    |
| LRRC8E                                                           | 0.0017609 | 42   | 0.0739578 | SH3KBP1                                                          | 0.0023903 | 42   | 0.1003926 |
| CD163                                                            | 0.0017707 | 43   | 0.0761401 | C14orf28                                                         | 0.0023998 | 43   | 0.1031914 |
| ZNF667                                                           | 0.0018053 | 44   | 0.0794332 | COL4A6                                                           | 0.0024012 | 44   | 0.1056528 |
| TPPP3                                                            | 0.0018093 | 45   | 0.0814185 | TLR4                                                             | 0.0024012 | 44   | 0.1056528 |
| VCL                                                              | 0.0018195 | 46   | 0.083697  | SNX6                                                             | 0.0024018 | 46   | 0.1104828 |
| KATNA1                                                           | 0.0018322 | 47   | 0.0861134 | EHMT1                                                            | 0.0024018 | 46   | 0.1104828 |
| FANCI                                                            | 0.0018472 | 48   | 0.0886656 | UBA5                                                             | 0.0024299 | 48   | 0.1166352 |
| ELAC2                                                            | 0.0018542 | 49   | 0.0908558 | ATP10A                                                           | 0.0024304 | 49   | 0.1190896 |
| CAST                                                             | 0.0018579 | 50   | 0.092895  | ZBTB32                                                           | 0.0024473 | 50   | 0.122365  |
| TYRP1                                                            | 0.0018705 | 51   | 0.0953955 | CTDSPL2                                                          | 0.0024525 | 51   | 0.1250775 |
| E4F1                                                             | 0.0018751 | 52   | 0.0975052 | PRDM13                                                           | 0.0024663 | 52   | 0.1282476 |
| NCOA3                                                            | 0.0018803 | 53   | 0.0996559 | NEK3                                                             | 0.0024698 | 53   | 0.1308994 |
| RABAC1                                                           | 0.0018888 | 54   | 0.1019952 | LCA5                                                             | 0.0024937 | 54   | 0.1346598 |
| LPCAT4                                                           | 0.0019048 | 55   | 0.104764  | TIMP3                                                            | 0.0025289 | 55   | 0.1390895 |
| ZNF286A                                                          | 0.0019209 | 56   | 0.1075704 | ACAD9                                                            | 0.0025464 | 56   | 0.1425984 |
| MFN1                                                             | 0.001931  | 57   | 0.110067  | SLC12A3                                                          | 0.0025528 | 57   | 0.1455096 |
| MYO9B                                                            | 0.001933  | 58   | 0.112114  | CCDC18                                                           | 0.0025528 | 57   | 0.1455096 |
| GSPT2                                                            | 0.001933  | 58   | 0.112114  | DOCK6                                                            | 0.0025528 | 57   | 0.1455096 |
| GAGE12I                                                          | 0.0019558 | 60   | 0.117348  | C9orf5                                                           | 0.0025728 | 60   | 0.154368  |
| HTN1                                                             | 0.0019558 | 60   | 0.117348  | C4orf39                                                          | 0.0025772 | 61   | 0.1572092 |
| GAGE7                                                            | 0.0019558 | 60   | 0.117348  | LRRC25                                                           | 0.0026092 | 62   | 0.1617704 |
| GAGE4                                                            | 0.0019558 | 60   | 0.117348  | RUNX2                                                            | 0.0026416 | 63   | 0.1664208 |
| YY1AP1                                                           | 0.0019629 | 64   | 0.1256256 | MLX                                                              | 0.0026416 | 63   | 0.1664208 |
| PSTPIP1                                                          | 0.0019724 | 65   | 0.128206  | SULT1A2                                                          | 0.0026422 | 65   | 0.171743  |
| MTFR1                                                            | 0.0019752 | 66   | 0.1303632 | SETD2                                                            | 0.0026622 | 66   | 0.1757052 |
| SERPINB10                                                        | 0.0019771 | 67   | 0.1324657 | G2E3                                                             | 0.0026798 | 67   | 0.1795466 |
| PKD2                                                             | 0.0019958 | 68   | 0.1357144 | ALDH6A1                                                          | 0.0026798 | 67   | 0.1795466 |
| GEM                                                              | 0.0020162 | 69   | 0.1391178 | GAD2                                                             | 0.0026798 | 67   | 0.1795466 |
| RNF114                                                           | 0.0020316 | 70   | 0.142212  | CPNE4                                                            | 0.0027084 | 70   | 0.189588  |
| IFT140                                                           | 0.0020393 | 71   | 0.1447903 | CFL2                                                             | 0.0027105 | 71   | 0.1924455 |
| SUZ12                                                            | 0.0020418 | 72   | 0.1470096 | PTGS2                                                            | 0.0027105 | 71   | 0.1924455 |
| MDC1                                                             | 0.0020512 | 73   | 0.1497376 | WIPF1                                                            | 0.0027387 | 73   | 0.1999251 |
| NPEPPS                                                           | 0.0020517 | 74   | 0.1518258 | DNAH1                                                            | 0.0027431 | 74   | 0.2029894 |
| APPL1                                                            | 0.0020534 | 75   | 0.154005  | C13orf27                                                         | 0.0027631 | 75   | 0.2072325 |
| BZRAP1                                                           | 0.0020614 | 76   | 0.1566664 | RXRA                                                             | 0.0027631 | 75   | 0.2072325 |

Supplemental Table 1 - Genes Identified by BINGS as mediators of AML cell fate in cytarabine

| MV4-11     |           |      |           | Molm13     |           |      |           |
|------------|-----------|------|-----------|------------|-----------|------|-----------|
| GeneSymbol | P(wZ)     | Rank | E value   | GeneSymbol | P(wZ)     | Rank | E value   |
| PDE4D      | 0.0020614 | 76   | 0.1566664 | GLCE       | 0.0027631 | 75   | 0.2072325 |
| PBX2       | 0.0020614 | 76   | 0.1566664 | RPS4X      | 0.0027631 | 75   | 0.2072325 |
| ZNF187     | 0.0020651 | 79   | 0.1631429 | SNTB2      | 0.0027824 | 79   | 0.2198096 |
| CACNB1     | 0.0020765 | 80   | 0.16612   | TAOK3      | 0.0027961 | 80   | 0.223688  |
| AXL        | 0.0020765 | 80   | 0.16612   | FAM149A    | 0.0027961 | 80   | 0.223688  |
| TBK1       | 0.0021308 | 82   | 0.1747256 | KAZALD1    | 0.0027961 | 80   | 0.223688  |
| PRMT2      | 0.0021354 | 83   | 0.1772382 | UGT1A8     | 0.0028251 | 83   | 0.2344833 |
| TCEAL2     | 0.0021526 | 84   | 0.1808184 | RNF126     | 0.0028297 | 84   | 0.2376948 |
| FEZ1       | 0.0021794 | 85   | 0.185249  | PPP1CB     | 0.0028338 | 85   | 0.240873  |
| MED21      | 0.0021816 | 86   | 0.1876176 | SCGB3A2    | 0.0028338 | 85   | 0.240873  |
| SLC39A14   | 0.0021822 | 87   | 0.1898514 | SFRS17A    | 0.0028338 | 85   | 0.240873  |
| ASB1       | 0.0021822 | 87   | 0.1898514 | CTSS       | 0.0028338 | 85   | 0.240873  |
| CACNA1G    | 0.0021822 | 87   | 0.1898514 | DOCK9      | 0.0028338 | 85   | 0.240873  |
| KRR1       | 0.0022084 | 90   | 0.198756  | ARHGAP11A  | 0.0028747 | 90   | 0.258723  |
| EVI2B      | 0.0022088 | 91   | 0.2010008 | CHIT1      | 0.0028812 | 91   | 0.2621892 |
| ZKSCAN5    | 0.0022088 | 91   | 0.2010008 | UBE3A      | 0.0028822 | 92   | 0.2651624 |
| INO80B     | 0.0022347 | 93   | 0.2078271 | KIAA1012   | 0.0028843 | 93   | 0.2682399 |
| HAPLN1     | 0.0022437 | 94   | 0.2109078 | PAK7       | 0.002886  | 94   | 0.271284  |
| ITPK1      | 0.0022862 | 95   | 0.217189  | DPYSL5     | 0.002886  | 94   | 0.271284  |
| EHHADH     | 0.00229   | 96   | 0.21984   | DUSP1      | 0.002886  | 94   | 0.271284  |
| LHX5       | 0.00229   | 96   | 0.21984   | CYHR1      | 0.002886  | 94   | 0.271284  |
| XRCC5      | 0.00229   | 96   | 0.21984   | STYK1      | 0.0028926 | 98   | 0.2834748 |
| ITIH2      | 0.00229   | 96   | 0.21984   | RHOQ       | 0.0029225 | 99   | 0.2893275 |
| MAT2A      | 0.0022902 | 100  | 0.22902   | MAN1A2     | 0.0029571 | 100  | 0.29571   |
| PKN2       | 0.0023091 | 101  | 0.2332191 | SECISBP2   | 0.0029571 | 100  | 0.29571   |
| GK2        | 0.0023091 | 101  | 0.2332191 | BZW2       | 0.0029571 | 100  | 0.29571   |
| SERPINB7   | 0.0023091 | 101  | 0.2332191 | ABCC4      | 0.0030012 | 103  | 0.3091236 |
| PEX11A     | 0.0023307 | 104  | 0.2423928 | SLC38A2    | 0.00302   | 104  | 0.31408   |
| GPI        | 0.0023355 | 105  | 0.2452275 | AUP1       | 0.0030254 | 105  | 0.317667  |
| NRIP2      | 0.0023692 | 106  | 0.2511352 | ARL6IP5    | 0.0030569 | 106  | 0.3240314 |
| CROP       | 0.0023828 | 107  | 0.2549596 | SUFU       | 0.0030808 | 107  | 0.3296456 |
| ABCF2      | 0.002387  | 108  | 0.257796  | FJX1       | 0.003089  | 108  | 0.333612  |
| POMP       | 0.002387  | 108  | 0.257796  | MAT1A      | 0.0031004 | 109  | 0.3379436 |
| DDX42      | 0.002387  | 108  | 0.257796  | BTBD2      | 0.0031167 | 110  | 0.342837  |
| TMEM70     | 0.0023876 | 111  | 0.2650236 | GATAD1     | 0.0031228 | 111  | 0.3466308 |
| IRF9       | 0.0023893 | 112  | 0.2676016 | DDX17      | 0.0031274 | 112  | 0.3502688 |
| RBBP9      | 0.0024046 | 113  | 0.2717198 | LTBP2      | 0.0031797 | 113  | 0.3593061 |
| DDX52      | 0.0024342 | 114  | 0.2774988 | FAM111B    | 0.0031797 | 113  | 0.3593061 |
| KIAA0746   | 0.0024654 | 115  | 0.283521  | VPS24      | 0.0031797 | 113  | 0.3593061 |
| MAD2L1     | 0.0024684 | 116  | 0.2863344 | CALR       | 0.0032424 | 116  | 0.3761184 |
| ANKRD26    | 0.0024684 | 116  | 0.2863344 | KLK3       | 0.003258  | 117  | 0.381186  |
| TBC1D4     | 0.0024684 | 116  | 0.2863344 | ZSCAN2     | 0.0032749 | 118  | 0.3864382 |
| MFNG       | 0.0024735 | 119  | 0.2943465 | PTGS1      | 0.0032749 | 118  | 0.3864382 |
| UCP3       | 0.0024803 | 120  | 0.297636  | FERMT1     | 0.0032909 | 120  | 0.394908  |
| FGA        | 0.0024821 | 121  | 0.3003341 | RBBP6      | 0.003327  | 121  | 0.402567  |
| PKP4       | 0.002496  | 122  | 0.304512  | PSG2       | 0.0033758 | 122  | 0.4118476 |
| H3F3B      | 0.0024999 | 123  | 0.3074877 | RNF219     | 0.0033758 | 122  | 0.4118476 |
| TRPC1      | 0.0025016 | 124  | 0.3101984 | CARD11     | 0.0033758 | 122  | 0.4118476 |
| LYST       | 0.0025099 | 125  | 0.3137375 | HLA-DPA1   | 0.0033758 | 122  | 0.4118476 |
| GAD1       | 0.0025185 | 126  | 0.317331  | DCT        | 0.0033871 | 126  | 0.4267746 |
| CSTF1      | 0.0025185 | 126  | 0.317331  | SSH3       | 0.0034094 | 127  | 0.4329938 |
| DPP3       | 0.0025185 | 126  | 0.317331  | FSD1L      | 0.0034094 | 127  | 0.4329938 |
| TMEM63A    | 0.0025472 | 129  | 0.3285888 | PERLD1     | 0.003447  | 129  | 0.444663  |
| SFRS14     | 0.0025543 | 130  | 0.332059  | RP1        | 0.0034617 | 130  | 0.450021  |
| ASAH1      | 0.002562  | 131  | 0.335622  | BNC2       | 0.0034769 | 131  | 0.4554739 |
| UCHL5IP    | 0.0025626 | 132  | 0.3382632 | SLC25A43   | 0.0034769 | 131  | 0.4554739 |
| DDO        | 0.0025732 | 133  | 0.3422356 | ZCWPW2     | 0.0034769 | 131  | 0.4554739 |
| ZNF117     | 0.0025732 | 133  | 0.3422356 | KLF17      | 0.003583  | 134  | 0.480122  |
| IL11       | 0.0025732 | 133  | 0.3422356 | ZNF396     | 0.003583  | 134  | 0.480122  |
| ITGAL      | 0.0025989 | 136  | 0.3534504 | ATP6V1A    | 0.0036127 | 136  | 0.4913272 |
| TPBG       | 0.0026576 | 137  | 0.3640912 | SLC8A1     | 0.0036201 | 137  | 0.4959537 |
| EFR3A      | 0.0026868 | 138  | 0.3707784 | ASPN       | 0.0036201 | 137  | 0.4959537 |
| PLA2G2F    | 0.0027167 | 139  | 0.3776213 | LANCL2     | 0.0036201 | 137  | 0.4959537 |
| PAPOLG     | 0.0027265 | 140  | 0.38171   | CDC2L5     | 0.0036201 | 137  | 0.4959537 |
| HBG2       | 0.0027449 | 141  | 0.3870309 | GN2        | 0.0036201 | 137  | 0.4959537 |
| HBG1       | 0.0027449 | 141  | 0.3870309 | CACNA2D2   | 0.0036201 | 137  | 0.4959537 |
| SMC6       | 0.0027641 | 143  | 0.3952663 | MKLN1      | 0.0036724 | 143  | 0.5251532 |
| CARS       | 0.0028139 | 144  | 0.4052016 | NDE1       | 0.0036977 | 144  | 0.5324688 |
| HDDC2      | 0.0028327 | 145  | 0.4107415 | BCR        | 0.0037382 | 145  | 0.542039  |
| CDYL       | 0.0028585 | 146  | 0.417341  | TATDN1     | 0.0037742 | 146  | 0.5510332 |
| ALOX5AP    | 0.0028809 | 147  | 0.4234923 | SMARCAD1   | 0.003805  | 147  | 0.559335  |
| LEPR       | 0.0028809 | 147  | 0.4234923 | HGF        | 0.003805  | 147  | 0.559335  |
| DBN1       | 0.0028809 | 147  | 0.4234923 | CUEDC2     | 0.003805  | 147  | 0.559335  |
| CHRNA5     | 0.0028809 | 147  | 0.4234923 | LYRM7      | 0.0038094 | 150  | 0.57141   |
| RAD52      | 0.0028809 | 147  | 0.4234923 | PDZD3      | 0.0039335 | 151  | 0.5939585 |
| RSAD2      | 0.0028809 | 147  | 0.4234923 | TRIM5      | 0.0039419 | 152  | 0.5991688 |
| KIAA1033   | 0.0028847 | 153  | 0.4413591 | CYP3A4     | 0.0039509 | 153  | 0.6044877 |

Supplemental Table 1 - Genes Identified by BINGS as mediators of AML cell fate in cytarabine

| MV4-11     |           |      |           | Molm13     |           |      |           |
|------------|-----------|------|-----------|------------|-----------|------|-----------|
| GeneSymbol | P(wZ)     | Rank | E value   | GeneSymbol | P(wZ)     | Rank | E value   |
| C1orf63    | 0.0029354 | 154  | 0.4520516 | KLHL7      | 0.0039927 | 154  | 0.6148758 |
| OGFRL1     | 0.0029377 | 155  | 0.4553435 | KCNK2      | 0.0039927 | 154  | 0.6148758 |
| UBE2G2     | 0.0030341 | 156  | 0.4733196 | NRSN1      | 0.0040106 | 156  | 0.6256536 |
| GLRB       | 0.0030375 | 157  | 0.4768875 | H2AFZ      | 0.0040106 | 156  | 0.6256536 |
| IL5RA      | 0.0030666 | 158  | 0.4845228 | USP12      | 0.0040106 | 156  | 0.6256536 |
| PRSS7      | 0.003073  | 159  | 0.488607  | CHD3       | 0.0041606 | 159  | 0.6615354 |
| MCM6       | 0.0030836 | 160  | 0.493376  | PLCG1      | 0.0041949 | 160  | 0.671184  |
| SEC62      | 0.0030971 | 161  | 0.4986331 | SIN3B      | 0.0042329 | 161  | 0.6814969 |
| ITGA7      | 0.0030971 | 161  | 0.4986331 | TTC3       | 0.0042412 | 162  | 0.6870744 |
| PLAU       | 0.0030971 | 161  | 0.4986331 | ZNF419     | 0.0042697 | 163  | 0.6959611 |
| CPE        | 0.0031046 | 164  | 0.5091544 | ANKRD33    | 0.0042697 | 163  | 0.6959611 |
| NPM3       | 0.0031303 | 165  | 0.5164995 | COPZ1      | 0.0042697 | 163  | 0.6959611 |
| ALDH3A2    | 0.0031308 | 166  | 0.5197128 | ESF1       | 0.0043042 | 166  | 0.7144972 |
| TIMELESS   | 0.0031447 | 167  | 0.5251649 | SETDB1     | 0.0043047 | 167  | 0.7188849 |
| NANOS1     | 0.0031641 | 168  | 0.5315688 | LRRFIP1    | 0.0043463 | 168  | 0.7301784 |
| TCF3       | 0.0031792 | 169  | 0.5372848 | ARMC2      | 0.0043463 | 168  | 0.7301784 |
| FBXO7      | 0.0031926 | 170  | 0.542742  | CHMP4A     | 0.004407  | 170  | 0.74919   |
| UNG        | 0.0032245 | 171  | 0.5513895 | GUCY1A3    | 0.0044933 | 171  | 0.7683543 |
| UBE2D4     | 0.0032314 | 172  | 0.5558008 | FZD9       | 0.0044952 | 172  | 0.7731744 |
| HMGCL      | 0.0032936 | 173  | 0.5697928 | IFIT5      | 0.0045274 | 173  | 0.7832402 |
| SPAG6      | 0.0032998 | 174  | 0.5741652 | ACOT2      | 0.0045502 | 174  | 0.7917348 |
| IDH3A      | 0.003302  | 175  | 0.57785   | MTMR12     | 0.0045502 | 174  | 0.7917348 |
| PTBP1      | 0.0033067 | 176  | 0.5819792 | YPEL1      | 0.0045502 | 174  | 0.7917348 |
| CDC25B     | 0.0033172 | 177  | 0.5871444 | LRRC31     | 0.0045502 | 174  | 0.7917348 |
| PHYH       | 0.0033172 | 177  | 0.5871444 | TMCC1      | 0.0045502 | 174  | 0.7917348 |
| GRK4       | 0.0033172 | 177  | 0.5871444 | GRM7       | 0.0045502 | 174  | 0.7917348 |
| WAC        | 0.0033172 | 177  | 0.5871444 | FAM108B1   | 0.0045502 | 174  | 0.7917348 |
| GNAL       | 0.0033172 | 177  | 0.5871444 | ACOT1      | 0.0045502 | 174  | 0.7917348 |
| PID1       | 0.0033172 | 177  | 0.5871444 | MAP3K8     | 0.0046489 | 182  | 0.8460998 |
| INPP4A     | 0.0033172 | 177  | 0.5871444 | RLBP1L2    | 0.0046553 | 183  | 0.8519199 |
| PNMAL1     | 0.0033172 | 177  | 0.5871444 | CPA4       | 0.0046554 | 184  | 0.8565936 |
| GPR175     | 0.0033172 | 177  | 0.5871444 | C1S        | 0.0047092 | 185  | 0.871202  |
| TARP       | 0.0033172 | 177  | 0.5871444 | BBS9       | 0.0047368 | 186  | 0.8810448 |
| PSMA7      | 0.0033221 | 187  | 0.6212327 | OR4D2      | 0.0047679 | 187  | 0.8915973 |
| CREBZF     | 0.0033716 | 188  | 0.6338608 | CCHCR1     | 0.0047679 | 187  | 0.8915973 |
| HUS1       | 0.0033995 | 189  | 0.6425055 | XPA        | 0.0048375 | 189  | 0.9142875 |
| TM4SF1     | 0.0034009 | 190  | 0.646171  | RICS       | 0.0048872 | 190  | 0.928568  |
| CACNG2     | 0.0035807 | 191  | 0.6839137 | CACNB2     | 0.0048874 | 191  | 0.9334934 |
| RCN2       | 0.0035861 | 192  | 0.6885312 | FTL        | 0.0048874 | 191  | 0.9334934 |
| FBXO9      | 0.003604  | 193  | 0.695572  | C2orf37    | 0.0048874 | 191  | 0.9334934 |
| LAPTM4A    | 0.003604  | 193  | 0.695572  | KRTAP4-12  | 0.0048874 | 191  | 0.9334934 |
| EPM2A      | 0.003604  | 193  | 0.695572  | FAM98B     | 0.0048874 | 191  | 0.9334934 |
| RAB6B      | 0.003604  | 193  | 0.695572  | CCNT1      | 0.0048874 | 191  | 0.9334934 |
| UBXN1      | 0.003604  | 193  | 0.695572  | XPO5       | 0.0048874 | 191  | 0.9334934 |
| POU1F1     | 0.0036208 | 198  | 0.7169184 | ZNF576     | 0.0049956 | 198  | 0.9891288 |
| FOXP1      | 0.0036208 | 198  | 0.7169184 | SS18       | 0.0050172 | 199  | 0.9984228 |
| GAPDH      | 0.0036661 | 200  | 0.73322   | FEM1B      | 0.0050405 | 200  | 1.0081    |
| SLC34A1    | 0.0036838 | 201  | 0.7404438 | CCT4       | 0.0050626 | 201  | 1.0175826 |
| SKP1       | 0.0037284 | 202  | 0.7531368 | RASGEF1A   | 0.0050626 | 201  | 1.0175826 |
| HNRNPD     | 0.0037518 | 203  | 0.7616154 | Cxorf40A   | 0.0051107 | 203  | 1.0374721 |
| SERPINB13  | 0.003765  | 204  | 0.76806   | IL8        | 0.0051318 | 204  | 1.0468872 |
| PSMA2      | 0.0037711 | 205  | 0.7730755 | ZNF544     | 0.005185  | 205  | 1.062925  |
| NRD1       | 0.0037725 | 206  | 0.777135  | RPS27L     | 0.005185  | 205  | 1.062925  |
| PTCH1      | 0.0037748 | 207  | 0.7813836 | NCOR2      | 0.0051935 | 207  | 1.0750545 |
| NEK1       | 0.0037978 | 208  | 0.7899424 | CLDN14     | 0.0051935 | 207  | 1.0750545 |
| SRGAP2     | 0.0037978 | 208  | 0.7899424 | CNTN3      | 0.0051935 | 207  | 1.0750545 |
| GNAS       | 0.0039111 | 210  | 0.821331  | KIF6       | 0.0051935 | 207  | 1.0750545 |
| IFI35      | 0.003917  | 211  | 0.826487  | SPSB3      | 0.0051935 | 207  | 1.0750545 |
| KIAA0999   | 0.0039515 | 212  | 0.837718  | RGAG1      | 0.0051935 | 207  | 1.0750545 |
| KCNH2      | 0.0039515 | 212  | 0.837718  | MED13      | 0.0051935 | 207  | 1.0750545 |
| EML4       | 0.0039557 | 214  | 0.8465198 | NOP2       | 0.0051935 | 207  | 1.0750545 |
| AKR7A2     | 0.0039557 | 214  | 0.8465198 | GPR45      | 0.0051935 | 207  | 1.0750545 |
| CNTNAP2    | 0.0039557 | 214  | 0.8465198 | GTF2I      | 0.0052575 | 216  | 1.13562   |
| CNBP       | 0.0039557 | 214  | 0.8465198 | ZMYND8     | 0.0052656 | 217  | 1.1426352 |
| NPAS2      | 0.0039557 | 214  | 0.8465198 | AK2        | 0.0052656 | 217  | 1.1426352 |
| SOX2       | 0.0039557 | 214  | 0.8465198 | TROVE2     | 0.0053018 | 219  | 1.1610942 |
| FLG        | 0.0039557 | 214  | 0.8465198 | PAPPA      | 0.0053391 | 220  | 1.174602  |
| OBP2A      | 0.0039849 | 221  | 0.8806629 | BGN        | 0.0055003 | 221  | 1.2155663 |
| OBP2B      | 0.0039849 | 221  | 0.8806629 | TMC6       | 0.0055003 | 221  | 1.2155663 |
| MCRS1      | 0.0040007 | 223  | 0.8921561 | TOP1       | 0.0055003 | 221  | 1.2155663 |
| MFSDF7     | 0.0041451 | 224  | 0.9285024 | SLMO2      | 0.0055354 | 224  | 1.2399296 |

Supplemental Table 1 - Genes Identified by BINGS as mediators of AML cell fate in cytarabine

| MV4-11     |           |      |           | Molm13     |           |      |           |
|------------|-----------|------|-----------|------------|-----------|------|-----------|
| GeneSymbol | P(wZ)     | Rank | E value   | GeneSymbol | P(wZ)     | Rank | E value   |
| MTMR4      | 0.0041451 | 224  | 0.9285024 | PPARG      | 0.0055955 | 225  | 1.2589875 |
| UBXN4      | 0.004168  | 226  | 0.941968  | CXorf40B   | 0.0056511 | 226  | 1.2771486 |
| RGS13      | 0.0042129 | 227  | 0.9563283 | FUT6       | 0.005691  | 227  | 1.291857  |
| TCEB3      | 0.0042311 | 228  | 0.9646908 | ADCY3      | 0.0056991 | 228  | 1.2993948 |
| SURF2      | 0.0042311 | 228  | 0.9646908 | CDC2L1     | 0.0056991 | 228  | 1.2993948 |
| C11orf30   | 0.0042804 | 230  | 0.984492  | RPRD1A     | 0.0056991 | 228  | 1.2993948 |
| IL32       | 0.0043194 | 231  | 0.9977814 | WBSR16     | 0.0056991 | 228  | 1.2993948 |
| MTF2       | 0.0043482 | 232  | 1.0087824 | CCNJL      | 0.0056991 | 228  | 1.2993948 |
| ADD2       | 0.0043945 | 233  | 1.0239185 | MYH14      | 0.0056991 | 228  | 1.2993948 |
| CDH7       | 0.0044101 | 234  | 1.0319634 | SH3BP4     | 0.0056991 | 228  | 1.2993948 |
| ARHGEF12   | 0.0044454 | 235  | 1.044669  | PLD1       | 0.0056991 | 228  | 1.2993948 |
| ZC3H14     | 0.0044479 | 236  | 1.0497044 | FLRT3      | 0.0056991 | 228  | 1.2993948 |
| LONP1      | 0.0045087 | 237  | 1.0685619 | RANBP9     | 0.0056991 | 228  | 1.2993948 |
| OR7A17     | 0.0045087 | 237  | 1.0685619 | MTHFR      | 0.0056991 | 228  | 1.2993948 |
| IRS1       | 0.0045087 | 237  | 1.0685619 | CENPO      | 0.0056991 | 228  | 1.2993948 |
| CDV3       | 0.0045087 | 237  | 1.0685619 | POLE2      | 0.0056991 | 228  | 1.2993948 |
| ZNF263     | 0.0046432 | 241  | 1.1190112 | VDAC2      | 0.0056991 | 228  | 1.2993948 |
| PCSK2      | 0.0046793 | 242  | 1.1323906 | CDC2L2     | 0.0056991 | 228  | 1.2993948 |
| C8orf79    | 0.0047591 | 243  | 1.1564613 | MYO7A      | 0.0057403 | 243  | 1.3948929 |
| POLE2      | 0.0047781 | 244  | 1.1658564 | DPEP1      | 0.0058797 | 244  | 1.4346468 |
| AK2        | 0.0048051 | 245  | 1.1772495 | NRG1       | 0.0058871 | 245  | 1.4423395 |
| PAFAH1B3   | 0.0048245 | 246  | 1.186827  | CORO6      | 0.0059313 | 246  | 1.4590998 |
| RHCE       | 0.0048344 | 247  | 1.1940968 | KLRK1      | 0.0059594 | 247  | 1.4719718 |
| UBE3A      | 0.0048891 | 248  | 1.2124968 | SLC16A3    | 0.0059594 | 247  | 1.4719718 |
| SPIN1      | 0.005068  | 249  | 1.261932  | ADAMTSS5   | 0.0060797 | 249  | 1.5138453 |
| CTNND1     | 0.0050877 | 250  | 1.271925  | MLL        | 0.0060797 | 249  | 1.5138453 |
| ZZZ3       | 0.0050877 | 250  | 1.271925  | KIAA1530   | 0.0061027 | 251  | 1.5317777 |
| STK3       | 0.0051369 | 252  | 1.2944988 | FGF14      | 0.0061027 | 251  | 1.5317777 |
| LGALS3BP   | 0.0052066 | 253  | 1.3172698 | BCAT2      | 0.006137  | 253  | 1.552661  |
| RAD54B     | 0.0052066 | 253  | 1.3172698 | PTAFR      | 0.0061575 | 254  | 1.564005  |
| ECT2       | 0.0052066 | 253  | 1.3172698 | RMND1      | 0.0061733 | 255  | 1.5741915 |
| RANBP9     | 0.0052066 | 253  | 1.3172698 | TPT1       | 0.006213  | 256  | 1.590528  |
| AGFG1      | 0.0052066 | 253  | 1.3172698 | HTATSF1    | 0.006213  | 256  | 1.590528  |
| TTN        | 0.0052066 | 253  | 1.3172698 | NIPSNAP3B  | 0.0062358 | 258  | 1.6088364 |
| SHC3       | 0.005232  | 259  | 1.355088  | NAGLU      | 0.0062358 | 258  | 1.6088364 |
| SFRS7      | 0.0052353 | 260  | 1.361178  | MMP14      | 0.0062358 | 258  | 1.6088364 |
| PAK2       | 0.0052353 | 260  | 1.361178  | TAGLN3     | 0.0062358 | 258  | 1.6088364 |
| TUBA1A     | 0.0052561 | 262  | 1.3770982 | GPR84      | 0.0062358 | 258  | 1.6088364 |
| TUBA1B     | 0.0052561 | 262  | 1.3770982 | CST11      | 0.0062358 | 258  | 1.6088364 |
| ARHGAP29   | 0.0052978 | 264  | 1.3986192 | JMJD2A     | 0.0062358 | 258  | 1.6088364 |
| DTNA       | 0.0053188 | 265  | 1.409482  | SFRS3      | 0.0062358 | 258  | 1.6088364 |
| GRAMD1C    | 0.0053315 | 266  | 1.418179  | FERMT2     | 0.0062358 | 258  | 1.6088364 |
| MTSS1      | 0.0053673 | 267  | 1.4330691 | SAP30      | 0.0062358 | 258  | 1.6088364 |
| SLC6A14    | 0.0053908 | 268  | 1.4447344 | TAF4       | 0.0062715 | 268  | 1.680762  |
| PLSCR1     | 0.0054117 | 269  | 1.4557473 | RASGRP1    | 0.006362  | 269  | 1.711378  |
| CBR3       | 0.0054564 | 270  | 1.473228  | ETFDH      | 0.006362  | 269  | 1.711378  |
| MIOX       | 0.0054604 | 271  | 1.4797684 | MPPE1      | 0.0064403 | 271  | 1.7453213 |
| STARD5     | 0.0055598 | 272  | 1.5122656 | SLC26A1    | 0.0064469 | 272  | 1.7535568 |
| FBXO28     | 0.0056481 | 273  | 1.5419313 | GRM8       | 0.0065034 | 273  | 1.7754282 |
| NRIP1      | 0.0056702 | 274  | 1.5536348 | RIC3       | 0.0065295 | 274  | 1.789083  |
| TAC3       | 0.0056882 | 275  | 1.564255  | KCNJ15     | 0.0065591 | 275  | 1.8037525 |
| DZIP3      | 0.0057405 | 276  | 1.584378  | NR4A1      | 0.0066125 | 276  | 1.82505   |
| IARS       | 0.0058147 | 277  | 1.6106719 | C1orf149   | 0.0066125 | 276  | 1.82505   |
| ATG5       | 0.0058404 | 278  | 1.6236312 | DCP2       | 0.0066322 | 278  | 1.8437516 |
| ZDHHC17    | 0.0058689 | 279  | 1.6374231 | DLEC1      | 0.0066785 | 279  | 1.8633015 |
| TIMM10     | 0.0058689 | 279  | 1.6374231 | MBD4       | 0.006762  | 280  | 1.89336   |
| BCAT1      | 0.0059081 | 281  | 1.6601761 | SPANXA1    | 0.0068254 | 281  | 1.9179374 |
| WHSC1L1    | 0.0059345 | 282  | 1.673529  | SPANXC     | 0.0068254 | 281  | 1.9179374 |
| CNTN6      | 0.0059531 | 283  | 1.6847273 | SPANXE     | 0.0068254 | 281  | 1.9179374 |
| VSNL1      | 0.0060158 | 284  | 1.7084872 | GRPEL1     | 0.0068939 | 284  | 1.9578676 |
| CCND2      | 0.006109  | 285  | 1.741065  | MYH9       | 0.0068939 | 284  | 1.9578676 |
| PIK3CB     | 0.0061148 | 286  | 1.7488328 | PSMAL      | 0.0069763 | 286  | 1.9952218 |
| TMCC2      | 0.0061148 | 286  | 1.7488328 |            |           |      |           |
| CYP4F3     | 0.0061148 | 286  | 1.7488328 |            |           |      |           |
| SLC45A2    | 0.0061148 | 286  | 1.7488328 |            |           |      |           |
| CYP4F2     | 0.0061148 | 286  | 1.7488328 |            |           |      |           |
| CDH12      | 0.0061169 | 291  | 1.7800179 |            |           |      |           |
| SH3TC2     | 0.0062585 | 292  | 1.827482  |            |           |      |           |
| CACYBP     | 0.0063776 | 293  | 1.8686368 |            |           |      |           |
| GRIK1      | 0.0064287 | 294  | 1.8900378 |            |           |      |           |
| PTH        | 0.0064825 | 295  | 1.9123375 |            |           |      |           |
| ECHS1      | 0.0065505 | 296  | 1.938948  |            |           |      |           |
| STOML2     | 0.0065505 | 296  | 1.938948  |            |           |      |           |
| SAFB       | 0.0066161 | 298  | 1.9715978 |            |           |      |           |
| FCGR2B     | 0.0066161 | 298  | 1.9715978 |            |           |      |           |
| FCGR2C     | 0.0066161 | 298  | 1.9715978 |            |           |      |           |
| GATAD1     | 0.0066161 | 298  | 1.9715978 |            |           |      |           |

Supplemental Table 1 - Genes Identified by BINGS as mediators of AML cell fate in cytarabine

| MV4-11                                                          |           |      |           | Molm13                                                          |           |      |           |
|-----------------------------------------------------------------|-----------|------|-----------|-----------------------------------------------------------------|-----------|------|-----------|
| GeneSymbol                                                      | P(wZ)     | Rank | E value   | GeneSymbol                                                      | P(wZ)     | Rank | E value   |
| <b><u>Genes which confer chemoresistance when inhibited</u></b> |           |      |           | <b><u>Genes which confer chemoresistance when inhibited</u></b> |           |      |           |
| DAZ1                                                            | 0.0008004 | 1    | 0.0008004 | ALG10                                                           | 1.90E-06  | 1    | 1.90E-06  |
| DAZ3                                                            | 0.0008004 | 1    | 0.0008004 | EPHB2                                                           | 5.01E-06  | 2    | 1.00E-05  |
| DAZ2                                                            | 0.0008004 | 1    | 0.0008004 | FMN2                                                            | 5.24E-06  | 3    | 1.57E-05  |
| DAZ4                                                            | 0.0008004 | 1    | 0.0008004 | ALS2CR11                                                        | 5.93E-06  | 4    | 2.37E-05  |
| STRN3                                                           | 0.0018925 | 5    | 0.0094625 | ABHD6                                                           | 8.39E-06  | 5    | 4.19E-05  |
| MAPK9                                                           | 0.0018945 | 6    | 0.011367  | CXorf22                                                         | 8.75E-06  | 6    | 5.25E-05  |
| PTPN11                                                          | 0.0019294 | 7    | 0.0135058 | ANXA4                                                           | 1.13E-05  | 7    | 7.89E-05  |
| SMC3                                                            | 0.0019299 | 8    | 0.0154392 | RSBN1                                                           | 1.16E-05  | 8    | 9.25E-05  |
| AFF1                                                            | 0.0020152 | 9    | 0.0181368 | DNAJB12                                                         | 1.35E-05  | 9    | 0.0001219 |
| GATAD1                                                          | 0.0020758 | 10   | 0.020758  | USP25                                                           | 1.62E-05  | 10   | 0.0001616 |
| NFATC2IP                                                        | 0.0022614 | 11   | 0.0248754 | CCNL1                                                           | 1.66E-05  | 11   | 0.0001828 |
| OLFML1                                                          | 0.0022614 | 11   | 0.0248754 | CCDC25                                                          | 1.67E-05  | 12   | 0.0002006 |
| ITSN1                                                           | 0.0023192 | 13   | 0.0301496 | SKI                                                             | 1.84E-05  | 13   | 0.0002395 |
| DMP1                                                            | 0.0023489 | 14   | 0.0328846 | PAX8                                                            | 2.02E-05  | 14   | 0.0002825 |
| CUL5                                                            | 0.0025691 | 15   | 0.0385365 | TTC22                                                           | 2.08E-05  | 15   | 0.0003123 |
| HLA-DPA1                                                        | 0.0025864 | 16   | 0.0413824 | DR1                                                             | 2.11E-05  | 16   | 0.0003376 |
| RAB3D                                                           | 0.0027041 | 17   | 0.0459697 | TPM4                                                            | 2.90E-05  | 17   | 0.0004925 |
| TLE1                                                            | 0.0028431 | 18   | 0.0511758 | PSMC1                                                           | 3.95E-05  | 18   | 0.0007102 |
| BLVRA                                                           | 0.0029318 | 19   | 0.0557042 | CYBB                                                            | 5.25E-05  | 19   | 0.000998  |
| SPON1                                                           | 0.003079  | 20   | 0.06158   | EDA                                                             | 6.74E-05  | 20   | 0.0013478 |
| RECQL                                                           | 0.0031486 | 21   | 0.0661206 | AXL                                                             | 7.70E-05  | 21   | 0.0016163 |
| BANK1                                                           | 0.0032929 | 22   | 0.0724438 | UNC5C                                                           | 8.50E-05  | 22   | 0.0018704 |
| BBS10                                                           | 0.0033994 | 23   | 0.0781862 | UBE2L3                                                          | 8.57E-05  | 23   | 0.0019704 |
| SYPL1                                                           | 0.003506  | 24   | 0.084144  | RPL13                                                           | 0.0001004 | 24   | 0.0024103 |
| PAFAH1B1                                                        | 0.0035339 | 25   | 0.0883475 | PIAS2                                                           | 0.000108  | 25   | 0.0026998 |
| MAGEB4                                                          | 0.0037326 | 26   | 0.0970476 | RUNX1                                                           | 0.0001141 | 26   | 0.0029674 |
| CCDC46                                                          | 0.0037345 | 27   | 0.1008315 | LPCAT2                                                          | 0.0001239 | 27   | 0.0033464 |
| NUP107                                                          | 0.0038748 | 28   | 0.1084944 | RPS6                                                            | 0.0001463 | 28   | 0.004095  |
| PLXNC1                                                          | 0.0041743 | 29   | 0.1210547 | SLC2A3                                                          | 0.0001608 | 29   | 0.0046641 |
| NF1                                                             | 0.0043188 | 30   | 0.129564  | TPT1                                                            | 0.000212  | 30   | 0.0063612 |
| DST                                                             | 0.0047386 | 31   | 0.1468966 | FANCA                                                           | 0.0002152 | 31   | 0.00667   |
| STAG2                                                           | 0.0049883 | 32   | 0.1596256 | ZNF276                                                          | 0.0002152 | 31   | 0.00667   |
| BCAP31                                                          | 0.0050364 | 33   | 0.1662012 | TRIM33                                                          | 0.0002275 | 33   | 0.0075082 |
| SLC6A6                                                          | 0.0050773 | 34   | 0.1726282 | KRT222P                                                         | 0.000253  | 34   | 0.0086006 |
| ZC3H11A                                                         | 0.0052024 | 35   | 0.182084  | KSR1                                                            | 0.0002635 | 35   | 0.0092229 |
| DHX57                                                           | 0.0053052 | 36   | 0.1909872 | CAMTA1                                                          | 0.0002738 | 36   | 0.0098554 |
| MAP4                                                            | 0.0054284 | 37   | 0.2008508 | RYK                                                             | 0.0002825 | 37   | 0.0104529 |
| DGKQ                                                            | 0.0057138 | 38   | 0.2171244 | U2AF2                                                           | 0.0002825 | 37   | 0.0104529 |
| PARP2                                                           | 0.0057472 | 39   | 0.2241408 | MEF2C                                                           | 0.0002836 | 39   | 0.0110616 |
| DUS4L                                                           | 0.0059457 | 40   | 0.237828  | INTS12                                                          | 0.0002962 | 40   | 0.0118468 |
| ARG2                                                            | 0.0059593 | 41   | 0.2443313 | HNRNPH1                                                         | 0.0003439 | 41   | 0.0140987 |
| PPARGC1B                                                        | 0.0060788 | 42   | 0.2553096 | OSBPL9                                                          | 0.0003538 | 42   | 0.0148609 |
| BZW1                                                            | 0.0060788 | 42   | 0.2553096 | FAM62A                                                          | 0.0003634 | 43   | 0.0156279 |
| HNRNPK                                                          | 0.0061535 | 44   | 0.270754  | PLEKHA3                                                         | 0.0003913 | 44   | 0.0172168 |
| TMX1                                                            | 0.0061543 | 45   | 0.2769435 | CPXCR1                                                          | 0.0004084 | 45   | 0.018378  |
| GNRHR                                                           | 0.0064391 | 46   | 0.2961986 | TRIOBP                                                          | 0.0004096 | 46   | 0.0188434 |
| RCHY1                                                           | 0.0064562 | 47   | 0.3034414 | DNAJC12                                                         | 0.0004324 | 47   | 0.0203242 |
| CD46                                                            | 0.0068001 | 48   | 0.3264048 | NEB                                                             | 0.0004418 | 48   | 0.0212059 |
| HNRNPH1                                                         | 0.0071652 | 49   | 0.3510948 | CEP170                                                          | 0.0004549 | 49   | 0.0222906 |
| AGPAT3                                                          | 0.0073125 | 50   | 0.365625  | HNRPDL                                                          | 0.0004554 | 50   | 0.0227715 |
| RRS1                                                            | 0.0073359 | 51   | 0.3741309 | PDLIM5                                                          | 0.0004588 | 51   | 0.0233968 |
| UBL3                                                            | 0.0075037 | 52   | 0.3901924 | PURA                                                            | 0.0004748 | 52   | 0.0246906 |
| RDX                                                             | 0.0075514 | 53   | 0.4002242 | TBX5                                                            | 0.0004757 | 53   | 0.0252116 |
| SELENBP1                                                        | 0.0075947 | 54   | 0.4101138 | SLC7A9                                                          | 0.0004857 | 54   | 0.0262256 |
| RALA                                                            | 0.0075947 | 54   | 0.4101138 | C14orf101                                                       | 0.0004925 | 55   | 0.0270853 |
| MS4A2                                                           | 0.007601  | 56   | 0.425656  | SOX11                                                           | 0.0005012 | 56   | 0.028065  |
| G3BP1                                                           | 0.0082256 | 57   | 0.4688592 | ZSCAN5A                                                         | 0.0005068 | 57   | 0.0288887 |
| CD58                                                            | 0.0087003 | 58   | 0.5046174 | FCRL4                                                           | 0.0005096 | 58   | 0.0295568 |
| TSR1                                                            | 0.0090563 | 59   | 0.5343217 | AQP1                                                            | 0.0005101 | 59   | 0.0300947 |
| SLC2A14                                                         | 0.009083  | 60   | 0.54498   | DKFZP586H2123                                                   | 0.0005149 | 60   | 0.0308916 |
| SLC2A3                                                          | 0.009083  | 60   | 0.54498   | C10orf90                                                        | 0.0005232 | 61   | 0.0319128 |
| PPP3CA                                                          | 0.0091275 | 62   | 0.565905  | SETDB1                                                          | 0.0005292 | 62   | 0.0328079 |
| TFPI                                                            | 0.0098118 | 63   | 0.6181434 | CACYBP                                                          | 0.0005399 | 63   | 0.0340112 |
| IKBKB                                                           | 0.010187  | 64   | 0.651968  | AFF3                                                            | 0.0005649 | 64   | 0.0361542 |
| SDC2                                                            | 0.011375  | 65   | 0.739375  | TRAPPC4                                                         | 0.0005669 | 65   | 0.0368472 |
| TUBB                                                            | 0.011668  | 66   | 0.770088  | DIAPH1                                                          | 0.0006167 | 66   | 0.0407042 |
| COX7B                                                           | 0.01217   | 67   | 0.81539   | FBXO11                                                          | 0.0006558 | 67   | 0.0439406 |
| SRPK2                                                           | 0.012622  | 68   | 0.858296  | PIGR                                                            | 0.0006774 | 68   | 0.0460625 |
| DPT                                                             | 0.013105  | 69   | 0.904245  | RNF160                                                          | 0.0007004 | 69   | 0.0483297 |
| ADM                                                             | 0.014197  | 70   | 0.99379   | ZNF77                                                           | 0.0007012 | 70   | 0.0490847 |
| C6orf106                                                        | 0.014851  | 71   | 1.054421  | LPIN1                                                           | 0.0007026 | 71   | 0.0498867 |
| ICT1                                                            | 0.01492   | 72   | 1.07424   | HSFY1                                                           | 0.0007268 | 72   | 0.0523282 |
| DHPS                                                            | 0.015183  | 73   | 1.108359  | CSTF2T                                                          | 0.0007331 | 73   | 0.0535148 |
| NDFIP1                                                          | 0.016552  | 74   | 1.224848  | TNFRSF19                                                        | 0.0007604 | 74   | 0.0562711 |
| GPRC5B                                                          | 0.016575  | 75   | 1.243125  | GTSE1                                                           | 0.000762  | 75   | 0.0571493 |
| PKP4                                                            | 0.016577  | 76   | 1.259852  | SLC6A8                                                          | 0.0007776 | 76   | 0.0590946 |



Supplemental Table 1 - Genes Identified by BINGS as mediators of AML cell fate in cytarabine

| MV4-11     |          |      |          | Molm13       |           |      |           |
|------------|----------|------|----------|--------------|-----------|------|-----------|
| GeneSymbol | P(wZ)    | Rank | E value  | GeneSymbol   | P(wZ)     | Rank | E value   |
| PIP4K2A    | 0.017157 | 77   | 1.321089 | GIMAP4       | 0.0008161 | 77   | 0.0628359 |
| CLEC1A     | 0.017401 | 78   | 1.357278 | TMCC3        | 0.0008161 | 77   | 0.0628359 |
| PCDHGA11   | 0.017466 | 79   | 1.379814 | LONP2        | 0.0008161 | 77   | 0.0628359 |
| CLASP2     | 0.0176   | 80   | 1.408    | GPR125       | 0.0008184 | 80   | 0.0654752 |
| ACTR3      | 0.01847  | 81   | 1.49607  | CISH         | 0.0008244 | 81   | 0.0667764 |
| CREBZF     | 0.018479 | 82   | 1.515278 | ZFYVE1       | 0.0008255 | 82   | 0.067691  |
| MARCH7     | 0.018723 | 83   | 1.554009 | TPK1         | 0.0008255 | 82   | 0.067691  |
| ABAT       | 0.018797 | 84   | 1.578948 | ZDHHCS       | 0.0008412 | 84   | 0.0706591 |
| CD93       | 0.019235 | 85   | 1.634975 | APOBEC3F     | 0.0008418 | 85   | 0.0715513 |
| B3GALNT1   | 0.020069 | 86   | 1.725934 | CLPTM1L      | 0.0008418 | 85   | 0.0715513 |
| NR112      | 0.020069 | 86   | 1.725934 | SPEF1        | 0.0008418 | 85   | 0.0715513 |
| CENPQ      | 0.02007  | 88   | 1.76616  | APOBEC3G     | 0.0008418 | 85   | 0.0715513 |
| ATXN10     | 0.02007  | 88   | 1.76616  | ATG10        | 0.0008418 | 85   | 0.0715513 |
| OR2B2      | 0.02007  | 88   | 1.76616  | LYZ          | 0.0008418 | 85   | 0.0715513 |
| ENPEP      | 0.02007  | 88   | 1.76616  | KIAA1432     | 0.000842  | 91   | 0.0766247 |
| ABL1       | 0.02007  | 88   | 1.76616  | PDE7A        | 0.0008438 | 92   | 0.0776333 |
| PAPOLA     | 0.02007  | 88   | 1.76616  | NCOA7        | 0.000845  | 93   | 0.0785822 |
| HUNK       | 0.02007  | 88   | 1.76616  | SF3A1        | 0.0008486 | 94   | 0.0797684 |
| MYOG       | 0.02007  | 88   | 1.76616  | HNRNPK       | 0.0008505 | 95   | 0.0807985 |
| C20orf195  | 0.02007  | 88   | 1.76616  | CDC25C       | 0.0008507 | 96   | 0.081671  |
| ZDHHCS     | 0.02007  | 88   | 1.76616  | PARP15       | 0.0008537 | 97   | 0.0828079 |
| ARRDC3     | 0.02007  | 88   | 1.76616  | OR5L1        | 0.000858  | 98   | 0.084085  |
| C5orf44    | 0.02007  | 88   | 1.76616  | OR5L2        | 0.000858  | 98   | 0.084085  |
|            |          |      |          | HLA-DRA      | 0.0008601 | 100  | 0.086006  |
|            |          |      |          | SGCD         | 0.0008616 | 101  | 0.0870206 |
|            |          |      |          | FUCA2        | 0.0008727 | 102  | 0.0890164 |
|            |          |      |          | AASDHPPT     | 0.0008727 | 102  | 0.0890164 |
|            |          |      |          | MAD2L1       | 0.0008796 | 104  | 0.0914732 |
|            |          |      |          | MAGEB6       | 0.0008836 | 105  | 0.092777  |
|            |          |      |          | WNT16        | 0.0008836 | 105  | 0.092777  |
|            |          |      |          | ZNF763       | 0.0008836 | 105  | 0.092777  |
|            |          |      |          | ARID4B       | 0.0008836 | 105  | 0.092777  |
|            |          |      |          | PCGF3        | 0.0008836 | 105  | 0.092777  |
|            |          |      |          | TC2N         | 0.0008836 | 105  | 0.092777  |
|            |          |      |          | EIF4B        | 0.0008836 | 105  | 0.092777  |
|            |          |      |          | MDH1B        | 0.0008836 | 105  | 0.092777  |
|            |          |      |          | OSGIN2       | 0.000891  | 113  | 0.1006864 |
|            |          |      |          | PTPN21       | 0.000891  | 113  | 0.1006864 |
|            |          |      |          | TRAPPC9      | 0.0009038 | 115  | 0.1039382 |
|            |          |      |          | COL29A1      | 0.0009038 | 115  | 0.1039382 |
|            |          |      |          | FAM167B      | 0.0009038 | 115  | 0.1039382 |
|            |          |      |          | PGLYRP4      | 0.0009038 | 115  | 0.1039382 |
|            |          |      |          | LOC90379     | 0.0009038 | 115  | 0.1039382 |
|            |          |      |          | TRIM36       | 0.0009038 | 115  | 0.1039382 |
|            |          |      |          | C6orf224     | 0.0009038 | 115  | 0.1039382 |
|            |          |      |          | C4orf17      | 0.0009139 | 122  | 0.1114934 |
|            |          |      |          | TMTC4        | 0.0009139 | 122  | 0.1114934 |
|            |          |      |          | C6orf162     | 0.0009263 | 124  | 0.1148562 |
|            |          |      |          | C4orf16      | 0.0009348 | 125  | 0.1168513 |
|            |          |      |          | POSTN        | 0.0009405 | 126  | 0.118498  |
|            |          |      |          | SPIC         | 0.000949  | 127  | 0.120523  |
|            |          |      |          | RMND1        | 0.000949  | 127  | 0.120523  |
|            |          |      |          | MAGT1        | 0.000949  | 127  | 0.120523  |
|            |          |      |          | MVP          | 0.000949  | 127  | 0.120523  |
|            |          |      |          | DAAM1        | 0.000949  | 127  | 0.120523  |
|            |          |      |          | C4orf37      | 0.0009513 | 132  | 0.1255769 |
|            |          |      |          | DNAH11       | 0.0009563 | 133  | 0.1271852 |
|            |          |      |          | TRIM6-TRIM34 | 0.0009563 | 133  | 0.1271852 |
|            |          |      |          | PSMC3IP      | 0.0009563 | 133  | 0.1271852 |
|            |          |      |          | TRIM34       | 0.0009563 | 133  | 0.1271852 |
|            |          |      |          | MLX          | 0.0009563 | 133  | 0.1271852 |
|            |          |      |          | UBA5         | 0.0009652 | 138  | 0.1332004 |
|            |          |      |          | TBL1XR1      | 0.000969  | 139  | 0.1346924 |
|            |          |      |          | KTI12        | 0.000969  | 139  | 0.1346924 |
|            |          |      |          | TRIM62       | 0.000969  | 139  | 0.1346924 |
|            |          |      |          | CPS1         | 0.000969  | 139  | 0.1346924 |
|            |          |      |          | ENOX2        | 0.0009703 | 143  | 0.1387458 |
|            |          |      |          | AQP4         | 0.0009738 | 144  | 0.1402286 |
|            |          |      |          | ZNF207       | 0.0009742 | 145  | 0.1412518 |
|            |          |      |          | IFNGR1       | 0.0009826 | 146  | 0.1434581 |
|            |          |      |          | SEZ6L        | 0.0009826 | 146  | 0.1434581 |
|            |          |      |          | NEO1         | 0.0009909 | 148  | 0.1466562 |
|            |          |      |          | KIAA0467     | 0.0009909 | 148  | 0.1466562 |
|            |          |      |          | SEMA5B       | 0.0009909 | 148  | 0.1466562 |
|            |          |      |          | PCDHB6       | 0.0009909 | 148  | 0.1466562 |
|            |          |      |          | EFCAB2       | 0.0009909 | 148  | 0.1466562 |
|            |          |      |          | C12orf54     | 0.0009909 | 148  | 0.1466562 |

Supplemental Table 1 - Genes Identified by BINGS as mediators of AML cell fate in cytarabine

| GeneSymbol | MV4-11 |      |         | GeneSymbol | Molm13    |      |           |
|------------|--------|------|---------|------------|-----------|------|-----------|
|            | P(wZ)  | Rank | E value |            | P(wZ)     | Rank | E value   |
|            |        |      |         | KLF12      | 0.0009999 | 154  | 0.1539831 |
|            |        |      |         | KPNA1      | 0.0010008 | 155  | 0.155124  |
|            |        |      |         | WDFY3      | 0.001004  | 156  | 0.156624  |
|            |        |      |         | KIAA0100   | 0.0010047 | 157  | 0.1577379 |
|            |        |      |         | RBBP6      | 0.0010047 | 157  | 0.1577379 |
|            |        |      |         | MUS81      | 0.0010047 | 157  | 0.1577379 |
|            |        |      |         | TCHP       | 0.0010047 | 157  | 0.1577379 |
|            |        |      |         | MRPS21     | 0.0010047 | 157  | 0.1577379 |
|            |        |      |         | FYB        | 0.0010047 | 157  | 0.1577379 |
|            |        |      |         | SARM1      | 0.0010047 | 157  | 0.1577379 |
|            |        |      |         | SLC46A1    | 0.0010047 | 157  | 0.1577379 |
|            |        |      |         | INTS2      | 0.0010204 | 165  | 0.168366  |
|            |        |      |         | FGFR2      | 0.0010375 | 166  | 0.172225  |
|            |        |      |         | TXNDC12    | 0.0010423 | 167  | 0.1740641 |
|            |        |      |         | SMAD7      | 0.0010423 | 167  | 0.1740641 |
|            |        |      |         | FKBP11     | 0.0010502 | 169  | 0.1774838 |
|            |        |      |         | CADM4      | 0.0010565 | 170  | 0.179605  |
|            |        |      |         | FANCG      | 0.0010572 | 171  | 0.1807812 |
|            |        |      |         | DLX6       | 0.0010608 | 172  | 0.1824576 |
|            |        |      |         | HMGCLL1    | 0.0010722 | 173  | 0.1854906 |
|            |        |      |         | QRSL1      | 0.0010722 | 173  | 0.1854906 |
|            |        |      |         | ZC3H13     | 0.0010722 | 173  | 0.1854906 |
|            |        |      |         | PKD2L1     | 0.0010751 | 176  | 0.1892176 |
|            |        |      |         | IMPG1      | 0.0010791 | 177  | 0.1910007 |
|            |        |      |         | OR2F2      | 0.0010974 | 178  | 0.1953372 |
|            |        |      |         | GPATCH8    | 0.0010987 | 179  | 0.1966673 |
|            |        |      |         | C10orf11   | 0.001101  | 180  | 0.19818   |
|            |        |      |         | FAM117B    | 0.001101  | 180  | 0.19818   |
|            |        |      |         | CCNE2      | 0.0011271 | 182  | 0.2051322 |
|            |        |      |         | FERMT3     | 0.0011328 | 183  | 0.2073024 |
|            |        |      |         | LYRM4      | 0.0011328 | 183  | 0.2073024 |
|            |        |      |         | PLDN       | 0.0011328 | 183  | 0.2073024 |
|            |        |      |         | TMEM71     | 0.0011328 | 183  | 0.2073024 |
|            |        |      |         | LPGAT1     | 0.0011533 | 187  | 0.2156671 |
|            |        |      |         | LAMA2      | 0.0011666 | 188  | 0.2193208 |
|            |        |      |         | SH2D1A     | 0.0011666 | 188  | 0.2193208 |
|            |        |      |         | MTIF3      | 0.0011666 | 188  | 0.2193208 |
|            |        |      |         | FAM131A    | 0.0011666 | 188  | 0.2193208 |
|            |        |      |         | SSX3       | 0.0011787 | 192  | 0.2263104 |
|            |        |      |         | KLK2       | 0.0011816 | 193  | 0.2280488 |
|            |        |      |         | EPHA3      | 0.0011842 | 194  | 0.2297348 |
|            |        |      |         | TBC1D8B    | 0.0012015 | 195  | 0.2342925 |
|            |        |      |         | MED23      | 0.0012024 | 196  | 0.2356704 |
|            |        |      |         | VCAN       | 0.001203  | 197  | 0.236991  |
|            |        |      |         | OIP5       | 0.0012073 | 198  | 0.2390454 |
|            |        |      |         | C2orf67    | 0.0012073 | 198  | 0.2390454 |
|            |        |      |         | RPE        | 0.0012073 | 198  | 0.2390454 |
|            |        |      |         | TLR10      | 0.0012073 | 198  | 0.2390454 |
|            |        |      |         | FASTKD5    | 0.0012073 | 198  | 0.2390454 |
|            |        |      |         | GPAM       | 0.0012073 | 198  | 0.2390454 |
|            |        |      |         | C19orf66   | 0.0012073 | 198  | 0.2390454 |
|            |        |      |         | TMEM177    | 0.0012073 | 198  | 0.2390454 |
|            |        |      |         | CCT5       | 0.0012073 | 198  | 0.2390454 |
|            |        |      |         | C1orf25    | 0.0012204 | 207  | 0.2526228 |
|            |        |      |         | CALU       | 0.0012268 | 208  | 0.2551744 |
|            |        |      |         | LRRC48     | 0.0012287 | 209  | 0.2567983 |
|            |        |      |         | RTP4       | 0.0012287 | 209  | 0.2567983 |
|            |        |      |         | SOX4       | 0.0012373 | 211  | 0.2610703 |
|            |        |      |         | IGF2BP3    | 0.0012373 | 211  | 0.2610703 |
|            |        |      |         | PAK7       | 0.0012407 | 213  | 0.2642691 |
|            |        |      |         | GK         | 0.0012449 | 214  | 0.2664086 |
|            |        |      |         | KIAA1219   | 0.0012506 | 215  | 0.268879  |
|            |        |      |         | FOXP3      | 0.0012506 | 215  | 0.268879  |
|            |        |      |         | CPT1A      | 0.0012506 | 215  | 0.268879  |
|            |        |      |         | ZCCHC9     | 0.0012506 | 215  | 0.268879  |
|            |        |      |         | LILRA5     | 0.0012506 | 215  | 0.268879  |
|            |        |      |         | TAF6L      | 0.0012506 | 215  | 0.268879  |
|            |        |      |         | ZNF562     | 0.0012506 | 215  | 0.268879  |
|            |        |      |         | CENPK      | 0.0012555 | 222  | 0.278721  |
|            |        |      |         | MTERFD2    | 0.0012555 | 222  | 0.278721  |
|            |        |      |         | FHL1       | 0.0012559 | 224  | 0.2813216 |
|            |        |      |         | PRPF38B    | 0.0012687 | 225  | 0.2854575 |
|            |        |      |         | C14orf4    | 0.0012813 | 226  | 0.2895738 |
|            |        |      |         | ARL5B      | 0.0012838 | 227  | 0.2914226 |
|            |        |      |         | C21orf66   | 0.0012877 | 228  | 0.2935956 |
|            |        |      |         | FAR1       | 0.0012879 | 229  | 0.2949291 |
|            |        |      |         | RBM4       | 0.0012932 | 230  | 0.297436  |

Supplemental Table 1 - Genes Identified by BINGS as mediators of AML cell fate in cytarabine

| GeneSymbol | MV4-11 |      |         | GeneSymbol | Molm13    |      |           |
|------------|--------|------|---------|------------|-----------|------|-----------|
|            | P(wZ)  | Rank | E value |            | P(wZ)     | Rank | E value   |
|            |        |      |         | GALNT3     | 0.0012943 | 231  | 0.2989833 |
|            |        |      |         | GPR34      | 0.0012943 | 231  | 0.2989833 |
|            |        |      |         | FAM115A    | 0.0012943 | 231  | 0.2989833 |
|            |        |      |         | DTX3       | 0.0012943 | 231  | 0.2989833 |
|            |        |      |         | PBRM1      | 0.0012943 | 231  | 0.2989833 |
|            |        |      |         | TTK        | 0.0012943 | 231  | 0.2989833 |
|            |        |      |         | MMP24      | 0.001313  | 237  | 0.311181  |
|            |        |      |         | KIAA0907   | 0.0013143 | 238  | 0.3128034 |
|            |        |      |         | WDR75      | 0.0013153 | 239  | 0.3143567 |
|            |        |      |         | ANGPTL6    | 0.0013186 | 240  | 0.316464  |
|            |        |      |         | SYNE2      | 0.0013318 | 241  | 0.3209638 |
|            |        |      |         | GNPTAB     | 0.0013402 | 242  | 0.3243284 |
|            |        |      |         | NOP14      | 0.0013471 | 243  | 0.3273453 |
|            |        |      |         | NCSTN      | 0.0013565 | 244  | 0.330986  |
|            |        |      |         | ZNF2       | 0.0013565 | 244  | 0.330986  |
|            |        |      |         | ZNF280D    | 0.0013565 | 244  | 0.330986  |
|            |        |      |         | SCO1       | 0.0013565 | 244  | 0.330986  |
|            |        |      |         | ANGPTL2    | 0.0013565 | 244  | 0.330986  |
|            |        |      |         | CD44       | 0.0013683 | 249  | 0.3407067 |
|            |        |      |         | PON2       | 0.001386  | 250  | 0.3465    |
|            |        |      |         | PSORS1C1   | 0.0013896 | 251  | 0.3487896 |
|            |        |      |         | KIAA1024   | 0.0013896 | 251  | 0.3487896 |
|            |        |      |         | LUC7L      | 0.0013896 | 251  | 0.3487896 |
|            |        |      |         | AADAT      | 0.0013896 | 251  | 0.3487896 |
|            |        |      |         | XPO5       | 0.0013896 | 251  | 0.3487896 |
|            |        |      |         | IDUA       | 0.001405  | 256  | 0.35968   |
|            |        |      |         | ENSA       | 0.0014185 | 257  | 0.3645545 |
|            |        |      |         | NUMA1      | 0.0014243 | 258  | 0.3674694 |
|            |        |      |         | C9orf4     | 0.0014261 | 259  | 0.3693599 |
|            |        |      |         | SLC22A11   | 0.0014276 | 260  | 0.371176  |
|            |        |      |         | JMJD1C     | 0.0014342 | 261  | 0.3743262 |
|            |        |      |         | FOXD4L1    | 0.0014373 | 262  | 0.3765726 |
|            |        |      |         | TMED7      | 0.0014373 | 262  | 0.3765726 |
|            |        |      |         | FOXD4      | 0.0014373 | 262  | 0.3765726 |
|            |        |      |         | GANAB      | 0.0014373 | 262  | 0.3765726 |
|            |        |      |         | PDE7B      | 0.0014373 | 262  | 0.3765726 |
|            |        |      |         | RHPN2      | 0.0014373 | 262  | 0.3765726 |
|            |        |      |         | SMYD2      | 0.0014373 | 262  | 0.3765726 |
|            |        |      |         | ANP32E     | 0.0014494 | 269  | 0.3898886 |
|            |        |      |         | LPHN1      | 0.00145   | 270  | 0.3915    |
|            |        |      |         | MED14      | 0.0014637 | 271  | 0.3966627 |
|            |        |      |         | FCGR2C     | 0.0014904 | 272  | 0.4053888 |
|            |        |      |         | HDX        | 0.0014939 | 273  | 0.4078347 |
|            |        |      |         | CANT1      | 0.001528  | 274  | 0.418672  |
|            |        |      |         | SKIL       | 0.001528  | 274  | 0.418672  |
|            |        |      |         | DNAJA2     | 0.001528  | 274  | 0.418672  |
|            |        |      |         | MGAT2      | 0.001528  | 274  | 0.418672  |
|            |        |      |         | SYCP3      | 0.001528  | 274  | 0.418672  |
|            |        |      |         | STIP1      | 0.001528  | 274  | 0.418672  |
|            |        |      |         | HTATSF1    | 0.001528  | 274  | 0.418672  |
|            |        |      |         | MEA1       | 0.001528  | 274  | 0.418672  |
|            |        |      |         | PPP2R2C    | 0.001528  | 274  | 0.418672  |
|            |        |      |         | CBL        | 0.001528  | 274  | 0.418672  |
|            |        |      |         | EEA1       | 0.001537  | 284  | 0.436508  |
|            |        |      |         | PSME4      | 0.0015453 | 285  | 0.4404105 |
|            |        |      |         | HSF1       | 0.00161   | 286  | 0.46046   |
|            |        |      |         | GYPC       | 0.0016435 | 287  | 0.4716845 |
|            |        |      |         | RTN4IP1    | 0.0016435 | 287  | 0.4716845 |
|            |        |      |         | API5       | 0.0016435 | 287  | 0.4716845 |
|            |        |      |         | OVOL1      | 0.0016435 | 287  | 0.4716845 |
|            |        |      |         | MRPL4      | 0.0016435 | 287  | 0.4716845 |
|            |        |      |         | HCN3       | 0.0016435 | 287  | 0.4716845 |
|            |        |      |         | TH1L       | 0.0016435 | 287  | 0.4716845 |
|            |        |      |         | YAF2       | 0.0016435 | 287  | 0.4716845 |
|            |        |      |         | FGFBP3     | 0.0016435 | 287  | 0.4716845 |
|            |        |      |         | SNAPC4     | 0.0016435 | 287  | 0.4716845 |
|            |        |      |         | OBFC2B     | 0.0016435 | 287  | 0.4716845 |
|            |        |      |         | GABARAPL1  | 0.0016435 | 287  | 0.4716845 |
|            |        |      |         | ZDHHC15    | 0.0016435 | 287  | 0.4716845 |
|            |        |      |         | KLHL22     | 0.0016435 | 287  | 0.4716845 |
|            |        |      |         | ADAT3      | 0.0016435 | 287  | 0.4716845 |
|            |        |      |         | ADSL       | 0.0016435 | 287  | 0.4716845 |
|            |        |      |         | FAM60A     | 0.0016442 | 303  | 0.4981926 |
|            |        |      |         | CCDC22     | 0.0016505 | 304  | 0.501752  |
|            |        |      |         | PEX5L      | 0.0016526 | 305  | 0.504043  |
|            |        |      |         | NADK       | 0.0016778 | 306  | 0.5134068 |
|            |        |      |         | TUB        | 0.0016778 | 306  | 0.5134068 |

Supplemental Table 1 - Genes Identified by BINGS as mediators of AML cell fate in cytarabine

| GeneSymbol | MV4-11 |      |         | GeneSymbol | Molm13    |      |           |
|------------|--------|------|---------|------------|-----------|------|-----------|
|            | P(wZ)  | Rank | E value |            | P(wZ)     | Rank | E value   |
|            |        |      |         | ESR1       | 0.0016885 | 308  | 0.520058  |
|            |        |      |         | LILRA2     | 0.0016963 | 309  | 0.5241567 |
|            |        |      |         | WBP4       | 0.0017357 | 310  | 0.538067  |
|            |        |      |         | NFIX       | 0.0017439 | 311  | 0.5423529 |
|            |        |      |         | OSBPL7     | 0.0017448 | 312  | 0.5443776 |
|            |        |      |         | ALDH5A1    | 0.0017536 | 313  | 0.5488768 |
|            |        |      |         | YTHDF3     | 0.0017564 | 314  | 0.5515096 |
|            |        |      |         | SLMO2      | 0.0017697 | 315  | 0.5574555 |
|            |        |      |         | DEPDC1     | 0.0017697 | 315  | 0.5574555 |
|            |        |      |         | TEKT5      | 0.0017697 | 315  | 0.5574555 |
|            |        |      |         | PEX14      | 0.0017697 | 315  | 0.5574555 |
|            |        |      |         | FOSL1      | 0.0017697 | 315  | 0.5574555 |
|            |        |      |         | NEBL       | 0.0017697 | 315  | 0.5574555 |
|            |        |      |         | ALG10B     | 0.0017697 | 315  | 0.5574555 |
|            |        |      |         | SLC35E1    | 0.0017697 | 315  | 0.5574555 |
|            |        |      |         | C2CD2L     | 0.0017697 | 315  | 0.5574555 |
|            |        |      |         | YWHAE      | 0.0017697 | 315  | 0.5574555 |
|            |        |      |         | C3AR1      | 0.0017697 | 315  | 0.5574555 |
|            |        |      |         | AMACR      | 0.0017697 | 315  | 0.5574555 |
|            |        |      |         | LYN        | 0.0017759 | 327  | 0.5807193 |
|            |        |      |         | HNRNPD     | 0.0018093 | 328  | 0.5934504 |
|            |        |      |         | ATP6V0D1   | 0.0018109 | 329  | 0.5957861 |
|            |        |      |         | MRPS30     | 0.0018173 | 330  | 0.599709  |
|            |        |      |         | DTNA       | 0.001818  | 331  | 0.601758  |
|            |        |      |         | LILRA4     | 0.0019084 | 332  | 0.6335888 |
|            |        |      |         | CYP11B1    | 0.001914  | 333  | 0.637362  |
|            |        |      |         | POF1B      | 0.0019232 | 334  | 0.6423488 |
|            |        |      |         | SDCCAG10   | 0.0019232 | 334  | 0.6423488 |
|            |        |      |         | EEF1D      | 0.0019232 | 334  | 0.6423488 |
|            |        |      |         | RND2       | 0.0019232 | 334  | 0.6423488 |
|            |        |      |         | ABCA13     | 0.0019232 | 334  | 0.6423488 |
|            |        |      |         | EIF6       | 0.0019232 | 334  | 0.6423488 |
|            |        |      |         | ZNF609     | 0.0019232 | 334  | 0.6423488 |
|            |        |      |         | GPR172A    | 0.0019232 | 334  | 0.6423488 |
|            |        |      |         | MIOS       | 0.0019232 | 334  | 0.6423488 |
|            |        |      |         | PPFIA4     | 0.0019232 | 334  | 0.6423488 |
|            |        |      |         | DSCC1      | 0.0019232 | 334  | 0.6423488 |
|            |        |      |         | ZNF484     | 0.0019232 | 334  | 0.6423488 |
|            |        |      |         | OR3A1      | 0.0019232 | 334  | 0.6423488 |
|            |        |      |         | TRNT1      | 0.0019232 | 334  | 0.6423488 |
|            |        |      |         | REV1       | 0.0019232 | 334  | 0.6423488 |
|            |        |      |         | ARFIP1     | 0.0019574 | 349  | 0.6831326 |
|            |        |      |         | HLA-DOA    | 0.0019587 | 350  | 0.685545  |
|            |        |      |         | CCND3      | 0.0019703 | 351  | 0.6915753 |
|            |        |      |         | MFSD4      | 0.0019703 | 351  | 0.6915753 |
|            |        |      |         | MKI67      | 0.0019728 | 353  | 0.6963984 |
|            |        |      |         | OPALIN     | 0.0019827 | 354  | 0.7018758 |
|            |        |      |         | CMTM6      | 0.0019849 | 355  | 0.7046395 |
|            |        |      |         | GRLF1      | 0.0019929 | 356  | 0.7094724 |
|            |        |      |         | EML4       | 0.0019996 | 357  | 0.7138572 |
|            |        |      |         | PABPC4     | 0.0020036 | 358  | 0.7172888 |
|            |        |      |         | GTF2I      | 0.0020036 | 358  | 0.7172888 |
|            |        |      |         | PPAP2A     | 0.0020036 | 358  | 0.7172888 |
|            |        |      |         | ERCC8      | 0.0020079 | 361  | 0.7248519 |
|            |        |      |         | DPM2       | 0.0020258 | 362  | 0.7333396 |
|            |        |      |         | WAC        | 0.002027  | 363  | 0.735801  |
|            |        |      |         | ZBTB7C     | 0.002036  | 364  | 0.741104  |
|            |        |      |         | RASGRP3    | 0.0020601 | 365  | 0.7519365 |
|            |        |      |         | OLFM2      | 0.0020601 | 365  | 0.7519365 |
|            |        |      |         | NARG2      | 0.002064  | 367  | 0.757488  |
|            |        |      |         | FAM120A    | 0.002064  | 367  | 0.757488  |
|            |        |      |         | TMLHE      | 0.002064  | 367  | 0.757488  |
|            |        |      |         | FAM65A     | 0.002064  | 367  | 0.757488  |
|            |        |      |         | TUBE1      | 0.002064  | 367  | 0.757488  |
|            |        |      |         | MRPS23     | 0.002064  | 367  | 0.757488  |
|            |        |      |         | RABEP1     | 0.002064  | 367  | 0.757488  |
|            |        |      |         | ST3GAL3    | 0.002064  | 367  | 0.757488  |
|            |        |      |         | CYorf15B   | 0.002064  | 367  | 0.757488  |
|            |        |      |         | INO80D     | 0.002064  | 367  | 0.757488  |
|            |        |      |         | ARL6IP6    | 0.002064  | 367  | 0.757488  |
|            |        |      |         | NECAP1     | 0.002064  | 367  | 0.757488  |
|            |        |      |         | ZSCAN18    | 0.002064  | 367  | 0.757488  |
|            |        |      |         | EVC2       | 0.002064  | 367  | 0.757488  |
|            |        |      |         | DOT1L      | 0.002064  | 367  | 0.757488  |
|            |        |      |         | GNAI3      | 0.0020654 | 382  | 0.7889828 |
|            |        |      |         | LAMA4      | 0.0020654 | 382  | 0.7889828 |
|            |        |      |         | CEP350     | 0.0020847 | 384  | 0.8005248 |

Supplemental Table 1 - Genes Identified by BINGS as mediators of AML cell fate in cytarabine

| GeneSymbol | MV4-11 |      |         | Molm13     |           |      |           |
|------------|--------|------|---------|------------|-----------|------|-----------|
|            | P(wZ)  | Rank | E value | GeneSymbol | P(wZ)     | Rank | E value   |
|            |        |      |         | MGC29506   | 0.0020974 | 385  | 0.807499  |
|            |        |      |         | RHOQ       | 0.0021001 | 386  | 0.8106386 |
|            |        |      |         | CPNE3      | 0.0021168 | 387  | 0.8192016 |
|            |        |      |         | CRAMP1L    | 0.0021615 | 388  | 0.838662  |
|            |        |      |         | DCUN1D4    | 0.0021755 | 389  | 0.8462695 |
|            |        |      |         | SRPRB      | 0.0021787 | 390  | 0.849693  |
|            |        |      |         | ADAP2      | 0.0022023 | 391  | 0.8610993 |
|            |        |      |         | ZBTB33     | 0.0022023 | 391  | 0.8610993 |
|            |        |      |         | GRID1      | 0.0022072 | 393  | 0.8674296 |
|            |        |      |         | BAX        | 0.0022109 | 394  | 0.8710946 |
|            |        |      |         | TMEM48     | 0.0022281 | 395  | 0.8800995 |
|            |        |      |         | GPR89B     | 0.0022372 | 396  | 0.8859312 |
|            |        |      |         | CORO1C     | 0.0022659 | 397  | 0.8995623 |
|            |        |      |         | SLC30A2    | 0.0022997 | 398  | 0.9152806 |
|            |        |      |         | LOC153364  | 0.0022997 | 398  | 0.9152806 |
|            |        |      |         | TNFSF8     | 0.0022997 | 398  | 0.9152806 |
|            |        |      |         | PRKAA1     | 0.0022997 | 398  | 0.9152806 |
|            |        |      |         | TCTN2      | 0.0022997 | 398  | 0.9152806 |
|            |        |      |         | OAZ1       | 0.0022997 | 398  | 0.9152806 |
|            |        |      |         | KCNE3      | 0.0022997 | 398  | 0.9152806 |
|            |        |      |         | POU6F1     | 0.0022997 | 398  | 0.9152806 |
|            |        |      |         | UFSP2      | 0.0022997 | 398  | 0.9152806 |
|            |        |      |         | TSHR       | 0.0022997 | 398  | 0.9152806 |
|            |        |      |         | ZDHHC16    | 0.0022997 | 398  | 0.9152806 |
|            |        |      |         | AICDA      | 0.0022997 | 398  | 0.9152806 |
|            |        |      |         | PHOX2A     | 0.0023166 | 410  | 0.949806  |
|            |        |      |         | RPRD1A     | 0.0023253 | 411  | 0.956983  |
|            |        |      |         | EEF2       | 0.0023323 | 412  | 0.9609076 |
|            |        |      |         | TNFRSF25   | 0.0023429 | 413  | 0.9676177 |
|            |        |      |         | NUP93      | 0.0023927 | 414  | 0.9905778 |
|            |        |      |         | SSBP3      | 0.002405  | 415  | 0.998075  |
|            |        |      |         | KMO        | 0.0024292 | 416  | 1.0105472 |
|            |        |      |         | FOLH1      | 0.0024806 | 417  | 1.0344102 |
|            |        |      |         | ARHGAP21   | 0.0024822 | 418  | 1.0375596 |
|            |        |      |         | MMP13      | 0.0024903 | 419  | 1.0434357 |
|            |        |      |         | CXorf21    | 0.0024903 | 419  | 1.0434357 |
|            |        |      |         | EMX2       | 0.0025065 | 421  | 1.0552365 |
|            |        |      |         | VANGL1     | 0.0025066 | 422  | 1.0577852 |
|            |        |      |         | ARSA       | 0.0025088 | 423  | 1.0612224 |
|            |        |      |         | SPRY2      | 0.0025537 | 424  | 1.0827688 |
|            |        |      |         | OPA3       | 0.0025537 | 424  | 1.0827688 |
|            |        |      |         | NBEA       | 0.0025537 | 424  | 1.0827688 |
|            |        |      |         | FAM9A      | 0.0025537 | 424  | 1.0827688 |
|            |        |      |         | PHEX       | 0.0025537 | 424  | 1.0827688 |
|            |        |      |         | C2orf68    | 0.0025537 | 424  | 1.0827688 |
|            |        |      |         | MTCP1      | 0.0025537 | 424  | 1.0827688 |
|            |        |      |         | JAM3       | 0.0025537 | 424  | 1.0827688 |
|            |        |      |         | HISPPD1    | 0.0025537 | 424  | 1.0827688 |
|            |        |      |         | FAM55A     | 0.0025537 | 424  | 1.0827688 |
|            |        |      |         | ERMP1      | 0.0025537 | 424  | 1.0827688 |
|            |        |      |         | ALDH1A2    | 0.0025537 | 424  | 1.0827688 |
|            |        |      |         | PRPF4      | 0.0025537 | 424  | 1.0827688 |
|            |        |      |         | ZNF575     | 0.0025537 | 424  | 1.0827688 |
|            |        |      |         | AP4E1      | 0.0025537 | 424  | 1.0827688 |
|            |        |      |         | RPL32      | 0.0025537 | 424  | 1.0827688 |
|            |        |      |         | SOX10      | 0.0025537 | 424  | 1.0827688 |
|            |        |      |         | LMX1A      | 0.0025537 | 424  | 1.0827688 |
|            |        |      |         | CHD1L      | 0.0025537 | 424  | 1.0827688 |
|            |        |      |         | TRIP6      | 0.0025537 | 424  | 1.0827688 |
|            |        |      |         | DNAJB2     | 0.0025537 | 424  | 1.0827688 |
|            |        |      |         | GABRG2     | 0.0025537 | 424  | 1.0827688 |
|            |        |      |         | HMX2       | 0.0025537 | 424  | 1.0827688 |
|            |        |      |         | RAMP1      | 0.0025537 | 424  | 1.0827688 |
|            |        |      |         | SNRPD1     | 0.0025537 | 424  | 1.0827688 |
|            |        |      |         | CYP24A1    | 0.0025537 | 424  | 1.0827688 |
|            |        |      |         | GRSF1      | 0.002586  | 450  | 1.1637    |
|            |        |      |         | MFNG       | 0.0025903 | 451  | 1.1682253 |
|            |        |      |         | MRAP       | 0.0026068 | 452  | 1.1782736 |
|            |        |      |         | COL2A1     | 0.0026442 | 453  | 1.1978226 |
|            |        |      |         | ZFP64      | 0.0026609 | 454  | 1.2080486 |
|            |        |      |         | C1QTNF5    | 0.0027038 | 455  | 1.230229  |
|            |        |      |         | APBA3      | 0.0027342 | 456  | 1.2467952 |
|            |        |      |         | USP1       | 0.0027356 | 457  | 1.2501692 |
|            |        |      |         | NFYB       | 0.0027405 | 458  | 1.255149  |
|            |        |      |         | ABCC9      | 0.0027405 | 458  | 1.255149  |
|            |        |      |         | NAPEPLD    | 0.0027442 | 460  | 1.262332  |
|            |        |      |         | CAND1      | 0.002756  | 461  | 1.270516  |

Supplemental Table 1 - Genes Identified by BINGS as mediators of AML cell fate in cytarabine

| GeneSymbol | MV4-11 |      |         | GeneSymbol | Molm13    |      |           |
|------------|--------|------|---------|------------|-----------|------|-----------|
|            | P(wZ)  | Rank | E value |            | P(wZ)     | Rank | E value   |
|            |        |      |         | DHX57      | 0.0027713 | 462  | 1.2803406 |
|            |        |      |         | MAF        | 0.0027816 | 463  | 1.2878808 |
|            |        |      |         | TWF2       | 0.0027883 | 464  | 1.2937712 |
|            |        |      |         | BHLHE40    | 0.0028456 | 465  | 1.323204  |
|            |        |      |         | NCBP1      | 0.0028615 | 466  | 1.333459  |
|            |        |      |         | USP48      | 0.0028668 | 467  | 1.3387956 |
|            |        |      |         | NCOA1      | 0.0028783 | 468  | 1.3470444 |
|            |        |      |         | WAPAL      | 0.0029825 | 469  | 1.3987925 |
|            |        |      |         | TREM1      | 0.0030029 | 470  | 1.411363  |
|            |        |      |         | TCL6       | 0.0030029 | 470  | 1.411363  |
|            |        |      |         | MMP11      | 0.0030029 | 470  | 1.411363  |
|            |        |      |         | SLCO2B1    | 0.003013  | 473  | 1.425149  |
|            |        |      |         | KIAA0329   | 0.00304   | 474  | 1.44096   |
|            |        |      |         | PKP2       | 0.003071  | 475  | 1.458725  |
|            |        |      |         | BCL9       | 0.003071  | 475  | 1.458725  |
|            |        |      |         | WDR17      | 0.003071  | 475  | 1.458725  |
|            |        |      |         | WDR18      | 0.003071  | 475  | 1.458725  |
|            |        |      |         | CYP39A1    | 0.003071  | 475  | 1.458725  |
|            |        |      |         | NPPA       | 0.003071  | 475  | 1.458725  |
|            |        |      |         | SLC2A14    | 0.003071  | 475  | 1.458725  |
|            |        |      |         | CEACAM4    | 0.003071  | 475  | 1.458725  |
|            |        |      |         | HTRA2      | 0.003071  | 475  | 1.458725  |
|            |        |      |         | RAG2       | 0.003071  | 475  | 1.458725  |
|            |        |      |         | TM2D3      | 0.0030804 | 485  | 1.493994  |
|            |        |      |         | FADS1      | 0.0030804 | 485  | 1.493994  |
|            |        |      |         | RNF148     | 0.0030804 | 485  | 1.493994  |
|            |        |      |         | PRKAR1A    | 0.0031281 | 488  | 1.5265128 |
|            |        |      |         | APH1A      | 0.0031748 | 489  | 1.5524772 |
|            |        |      |         | ACVR1B     | 0.003206  | 490  | 1.57094   |
|            |        |      |         | DOC2B      | 0.0032698 | 491  | 1.6054718 |
|            |        |      |         | BFAR       | 0.0032698 | 491  | 1.6054718 |
|            |        |      |         | RGS18      | 0.0032928 | 493  | 1.6233504 |
|            |        |      |         | PRUNE      | 0.0033881 | 494  | 1.6737214 |
|            |        |      |         | TRIM68     | 0.0034376 | 495  | 1.701612  |
|            |        |      |         | RBM22      | 0.0034495 | 496  | 1.710952  |
|            |        |      |         | FAS        | 0.0034499 | 497  | 1.7146003 |
|            |        |      |         | MRPL1      | 0.0036776 | 498  | 1.8314448 |
|            |        |      |         | CBLL1      | 0.0036776 | 498  | 1.8314448 |
|            |        |      |         | COL18A1    | 0.0036776 | 498  | 1.8314448 |
|            |        |      |         | FGF1       | 0.0036776 | 498  | 1.8314448 |
|            |        |      |         | PDAP1      | 0.0036776 | 498  | 1.8314448 |
|            |        |      |         | TBC1D15    | 0.0036776 | 498  | 1.8314448 |
|            |        |      |         | SFMBT1     | 0.0036776 | 498  | 1.8314448 |
|            |        |      |         | CYB5A      | 0.0036776 | 498  | 1.8314448 |
|            |        |      |         | NEUROD1    | 0.0036776 | 498  | 1.8314448 |
|            |        |      |         | NQO1       | 0.0036776 | 498  | 1.8314448 |
|            |        |      |         | DPP10      | 0.0036776 | 498  | 1.8314448 |
|            |        |      |         | CRTAM      | 0.0036776 | 498  | 1.8314448 |
|            |        |      |         | EP400      | 0.0036776 | 498  | 1.8314448 |
|            |        |      |         | LIAS       | 0.0036776 | 498  | 1.8314448 |
|            |        |      |         | MPP5       | 0.0036776 | 498  | 1.8314448 |
|            |        |      |         | LOX        | 0.0036776 | 498  | 1.8314448 |
|            |        |      |         | NSUN7      | 0.0036776 | 498  | 1.8314448 |
|            |        |      |         | TIMM8B     | 0.0036776 | 498  | 1.8314448 |
|            |        |      |         | TM4SF5     | 0.0036776 | 498  | 1.8314448 |
|            |        |      |         | RPS27      | 0.0036776 | 498  | 1.8314448 |
|            |        |      |         | TLR4       | 0.003697  | 518  | 1.915046  |
|            |        |      |         | POLDIP3    | 0.0038295 | 519  | 1.9875105 |
|            |        |      |         | H2AFV      | 0.0038295 | 519  | 1.9875105 |
|            |        |      |         | AFG3L2     | 0.0038295 | 519  | 1.9875105 |

Supplemental Table 2 - Genes Identified by RFC as mediators of AML cell fate in cytarabine

| MV4-11     |              | Molm13     |              |
|------------|--------------|------------|--------------|
| GeneSymbol | log2nFC      | GeneSymbol | log2nFC      |
| DLX4       | -4.597072929 | CACNG6     | -3.800313111 |
| WEE1       | -3.862507006 | ATF5       | -3.438648166 |
| TUBB1      | -3.590536218 | SPRED2     | -3.343078485 |
| RAD52      | -3.326683677 | SMPD1      | -3.241508867 |
| SKP1       | -3.27614601  | CLDN20     | -3.170573749 |
| VCL        | -3.258145204 | PTPRR      | -3.081981786 |
| POLR3E     | -3.229308243 | ZFP42      | -2.966281693 |
| HSBP1      | -3.14403938  | STC1       | -2.91353524  |
| FUSIP1     | -3.137320823 | FKBP1A     | -2.896983553 |
| HIST1H2BK  | -3.117291165 | MED21      | -2.887918034 |
| FHL1       | -3.078975163 | ZBTB7A     | -2.83997411  |
| REEP1      | -3.011378432 | MFF        | -2.789096131 |
| DCLRE1B    | -2.944227192 | EIF5B      | -2.7724533   |
| ACVR1B     | -2.771340776 | RWDD2A     | -2.755673891 |
| FN1        | -2.674823875 | POLR2C     | -2.720398184 |
| ABCE1      | -2.662331699 | PAQR6      | -2.699524076 |
| RAD17      | -2.620217591 | SCRN3      | -2.689748953 |
| BRCC3      | -2.601738851 | MAPK8IP3   | -2.6662447   |
| ANKRD28    | -2.601671488 | PPP3CA     | -2.643453047 |
| UBE3A      | -2.596832638 | MDGA2      | -2.639315061 |
| PIP5K3     | -2.56722358  | SLC1A2     | -2.637359306 |
| NBN        | -2.553856542 | RAD18      | -2.623569122 |
| NBS        | -2.553856542 | LRRC25     | -2.608830509 |
| PHYH       | -2.525330448 | TMEM97     | -2.583393865 |
| TMEM87A    | -2.476952135 | ARHGAP11A  | -2.560433311 |
| SAFB       | -2.427593194 | FHL1       | -2.557424088 |
| CHAF1A     | -2.392818475 | C4orf18    | -2.550018539 |
| PRKCA      | -2.369836031 | CPNE4      | -2.521213374 |
| KRT33B     | -2.292377061 | ARSD       | -2.515967465 |
| CPE        | -2.287604788 | RUNX2      | -2.50997655  |
| MAT2A      | -2.263768024 | TIMP3      | -2.496327011 |
| ANAPC5     | -2.241611108 | TUBB3      | -2.490457878 |
| EFR3A      | -2.223958722 | RRAGA      | -2.483684238 |
| ATP2B4     | -2.197839318 | C9orf5     | -2.483631245 |
| DTNA       | -2.196057539 | KIAA1012   | -2.48229368  |
| KIAA1033   | -2.187653543 | NCOA2      | -2.479487227 |
| SACM1L     | -2.16038101  | UBA5       | -2.478426746 |
| PTGER3     | -2.159490107 | SMOX       | -2.473555181 |
| PRND       | -2.150833672 | SFRP1      | -2.459378966 |
| FGA        | -2.146677492 | CLIC5      | -2.439639351 |
| CREBZF     | -2.140521303 | NPAS2      | -2.434485065 |
| LRRC8E     | -2.129029302 | HSP90AA1   | -2.426951764 |
| TRPC1      | -2.125354734 | UBE3A      | -2.422398664 |
| IDH3A      | -2.111197735 | ITGB3      | -2.420817832 |
| YWHAQ      | -2.106524734 | DOCK9      | -2.418694242 |
| PTBP1      | -2.027059636 | MLL        | -2.412009909 |
| CDH12      | -2.004248972 | TEAD4      | -2.409161464 |
| PPAT       | -1.956212221 | SNTB2      | -2.398903091 |
| FDX1       | -1.947227859 | ITGB8      | -2.398839629 |
| SPA17      | -1.927482493 | MAP3K8     | -2.396959088 |
| CDH19      | -1.917120285 | CCHCR1     | -2.39096079  |
| RPL24      | -1.913178121 | NEK3       | -2.389243275 |
| STAMBP     | -1.911063016 | AR         | -2.386921115 |
| DSCR6      | -1.896878563 | RBBP6      | -2.385583937 |
| SLC39A2    | -1.896389084 | GOLGA2     | -2.383838537 |
| H3F3B      | -1.887780954 | GSTA4      | -2.378936928 |
| NPIPL1     | -1.886636672 | OR4D2      | -2.371391748 |
| ATP6V1A    | -1.880320201 | COX15      | -2.370107333 |
| SHANK2     | -1.870381895 | SULT1A2    | -2.340875305 |
| KIR3DL1    | -1.82984297  | NDE1       | -2.337137234 |
| ZNF415     | -1.828673713 | FUT6       | -2.322258708 |
| SLTM       | -1.825023916 | BBS9       | -2.318381204 |
| CSPG4      | -1.808950335 | GTF2I      | -2.31001486  |
| RPS6KA5    | -1.801747911 | IFIT5      | -2.309785377 |
| SYCP1      | -1.789187072 | PTBP1      | -2.306433807 |
| ACADL      | -1.767335013 | MYO7A      | -2.301360731 |
| AQP6       | -1.764862522 | ASPH       | -2.29845644  |

Supplemental Table 2 - Genes Identified by RFC as mediators of AML cell fate in cytarabine

| MV4-11     |              | Molm13     |              |
|------------|--------------|------------|--------------|
| GeneSymbol | log2nFC      | GeneSymbol | log2nFC      |
| ZNF22      | -1.750987869 | ABCC4      | -2.295025045 |
| NRAP       | -1.724330538 | ADAMTS5    | -2.293091915 |
| CD209      | -1.696619592 | UPF3A      | -2.289585896 |
| ECSIT      | -1.671098503 | SETDB1     | -2.28291541  |
| NDUFB4     | -1.671098503 | ACVR1B     | -2.279540272 |
| NCAPD2     | -1.67099462  | CDC42EP4   | -2.279354044 |
| PRSS21     | -1.659148272 | RPS6KB1    | -2.27761968  |
| CX3CL1     | -1.643824492 | ZNF396     | -2.274564456 |
| STX2       | -1.625220553 | POT1       | -2.268629314 |
| PNLIP      | -1.602237648 | XPA        | -2.26228205  |
| PPP6C      | 1.652676636  | TRIM7      | -2.255919396 |
| NFYC       | 1.679225913  | PDE4DIP    | -2.253930816 |
| FAM98A     | 1.690146697  | SBF1       | -2.253865911 |
| KIR3DL1    | 1.710647368  | KIR2DL1    | -2.248336973 |
| FZD7       | 1.746074802  | KIR2DL2    | -2.248336973 |
| SHROOM2    | 1.813529598  | PBX2       | -2.240512748 |
| CYB5A      | 1.81467233   | KCNJ15     | -2.2351404   |
| CHN2       | 1.814703352  | RIC3       | -2.226061897 |
| TRIOBP     | 1.818140028  | NADK       | -2.223981508 |
| GTF2H1     | 1.820731721  | GGA2       | -2.214347826 |
| CPNE3      | 1.843777728  | TMEM51     | -2.20534268  |
| KCTD12     | 1.844263115  | TUBB2A     | -2.204364033 |
| PKDREJ     | 1.855767128  | TUBB2B     | -2.204364033 |
| OR7A17     | 1.869855903  | RAG1AP1    | -2.189433391 |
| FYB        | 1.874571455  | VAC14      | -2.187950164 |
| SP110      | 1.878816771  | C12orf35   | -2.186489174 |
| GART       | 1.916587107  | C1orf149   | -2.183977451 |
| CHRNE      | 1.931417974  | DCP2       | -2.183835871 |
| ACTC1      | 1.946580049  | SEPT6      | -2.178409205 |
| SENP3      | 1.94723346   | IGF2R      | -2.176481522 |
| UGDH       | 1.967321587  | CPLX3      | -2.174969675 |
| NCR1       | 1.969719783  | CXCR7      | -2.17052744  |
| NASP       | 1.98244456   | RICS       | -2.169074036 |
| ASMT       | 2.030945573  | RHOJ       | -2.168988669 |
| SEMA4F     | 2.039157386  | PPFIBP1    | -2.164223803 |
| CDC14A     | 2.04726106   | RMND1      | -2.163085072 |
| TRAF5      | 2.054596837  | NRG1       | -2.161100087 |
| NDRG3      | 2.059112157  | SLC26A1    | -2.160389677 |
| BUB3       | 2.066192058  | MT3        | -2.1569296   |
| KARS       | 2.068193319  | ZNF644     | -2.155855408 |
| TPSAB1     | 2.070665653  | KLC1       | -2.150637393 |
| TPSB2      | 2.070665653  | LYRM7      | -2.147389293 |
| GBP1       | 2.070889673  | ADAMTS19   | -2.143155133 |
| AZGP1      | 2.07924661   | MAP4K2     | -2.14216245  |
| EDNRB      | 2.081711689  | UBE2D2     | -2.140594333 |
| APBA2      | 2.088801627  | DNAL1      | -2.139132669 |
| CLIP1      | 2.094791902  | ATP11A     | -2.128898791 |
| SLAMF8     | 2.103841415  | FOXO3      | -2.119121081 |
| MED20      | 2.107930469  | MBNL1      | -2.104776178 |
| EFEMP1     | 2.113024194  | SLA        | -2.102938666 |
| ATP2A2     | 2.119843652  | SMARCA2    | -2.102007079 |
| GULP1      | 2.135808276  | ADK        | -2.097510135 |
| HSBP1      | 2.165809972  | CDC2L6     | -2.094970211 |
| VTI1B      | 2.167209049  | THOC1      | -2.092972408 |
| C1orf115   | 2.16724852   | NMT1       | -2.08977291  |
| TOP2A      | 2.167256451  | CALM1      | -2.087609815 |
| USP34      | 2.175545389  | KYNU       | -2.081977635 |
| CLASP2     | 2.186967719  | TAF4       | -2.064908496 |
| CTH        | 2.193290042  | CDH19      | -2.053223085 |
| PSG9       | 2.194407556  | NTSR2      | -2.053223085 |
| TFB1M      | 2.195917549  | RAB18      | -2.053003459 |
| STAT1      | 2.196634055  | PTGER3     | -2.052916509 |
| UGDH       | 2.199266594  | DIDO1      | -2.045997773 |
| ZC3H11A    | 2.204359337  | TUBG1      | -2.043771234 |
| HMGNA4     | 2.205204996  | ZC3HAV1L   | -2.043771234 |
| CPLX2      | 2.20954929   | GLS        | -2.04199351  |
| MCM4       | 2.214491183  | CAST       | -2.03775107  |



Supplemental Table 2 - Genes Identified by RFC as mediators of AML cell fate in cytarabine

| MV4-11     |             | Molm13     |              |
|------------|-------------|------------|--------------|
| GeneSymbol | log2nFC     | GeneSymbol | log2nFC      |
| SPON1      | 2.229431676 | GRTP1      | -2.036565989 |
| DOC2A      | 2.231413716 | CACYBP     | -2.032165387 |
| PDCD4      | 2.242448747 | C1S        | -2.027044678 |
| PSG1       | 2.256958738 | RLIM       | -2.019371101 |
| PSG6       | 2.256958738 | SPAM1      | -2.018097768 |
| PSG8       | 2.256958738 | EIF2S1     | -2.006057926 |
| MAFB       | 2.26642233  | NTRK1      | -2.005843758 |
| POLE3      | 2.271738557 | IGFBP5     | -2.001449718 |
| CD24       | 2.274761954 | CELSR1     | -1.998695871 |
| PIK3R1     | 2.283173965 | WAC        | -1.996031934 |
| MBD2       | 2.294428651 | CSRNP3     | -1.99255082  |
| ME2        | 2.31491343  | RNASET2    | -1.984373872 |
| UBE3A      | 2.329271843 | MRPS25     | -1.978030308 |
| SAA1       | 2.335288641 | BAALC      | -1.97696829  |
| TUBB       | 2.347819708 | HNRNPM     | -1.97554906  |
| MARS       | 2.351453724 | ESR1       | -1.974719044 |
| AGFG1      | 2.360906108 | STAT5B     | -1.963000077 |
| PRKCB      | 2.364044764 | RETNLB     | -1.959455313 |
| CREBZF     | 2.369003474 | PFAFH1B3   | -1.958610782 |
| BUB3       | 2.369790932 | ADAM28     | -1.95786646  |
| STAU1      | 2.376769931 | FEN1       | -1.957588676 |
| QKI        | 2.402762988 | LUC7L      | -1.957584594 |
| TP11       | 2.412213491 | RAC2       | -1.956357805 |
| PIP4K2A    | 2.417765869 | ZNF250     | -1.956175995 |
| SAA2       | 2.434380014 | H1FO       | -1.950008637 |
| NFX1       | 2.438210367 | TXNIP      | -1.946073233 |
| CD93       | 2.442401192 | NCAPD2     | -1.944429334 |
| PIAS2      | 2.454697212 | EPHB4      | -1.940398202 |
| RAB5A      | 2.465798625 | MTSS1      | -1.932714644 |
| RPL39      | 2.478910025 | GBP1       | -1.931096917 |
| SRPK2      | 2.499503184 | SLC16A5    | -1.92297251  |
| SPON1      | 2.513328371 | ZNF609     | -1.922521712 |
| CLEC1A     | 2.515853836 | IL25       | -1.91909093  |
| SLC6A6     | 2.530975098 | FOXC2      | -1.917912711 |
| NNMT       | 2.531689525 | BLVRA      | -1.916297199 |
| FAM21A     | 2.539534738 | PDLIM4     | -1.915767958 |
| FAM21C     | 2.539534738 | FARSA      | -1.912890182 |
| PPP6C      | 2.540991525 | IL17A      | -1.910642976 |
| C6orf106   | 2.55251939  | GRK6       | -1.910492253 |
| RCHY1      | 2.560075995 | WNT16      | -1.902191646 |
| DHPS       | 2.561257172 | NRP2       | -1.901515909 |
| MAP4       | 2.564673525 | CR1        | -1.90120914  |
| ACTR3      | 2.566686822 | SF3B1      | -1.897010737 |
| NDFIP1     | 2.567836015 | NRF1       | -1.892559285 |
| BID        | 2.568057277 | CC2D1A     | -1.891757477 |
| SYPL1      | 2.570029281 | PPP1R7     | -1.88979526  |
| MTRR       | 2.577921658 | HLA-DQB1   | -1.884767555 |
| PCDHGA11   | 2.579058853 | CDC27      | -1.883357407 |
| SELENBP1   | 2.583607437 | FCER1G     | -1.881170546 |
| RRS1       | 2.611194151 | N4BP2L1    | -1.877161037 |
| HNRNPH1    | 2.623504236 | ZNF749     | -1.87704689  |
| PKP4       | 2.629677234 | RFC3       | -1.872968043 |
| DPT        | 2.631147038 | FGF5       | -1.869457071 |
| STX6       | 2.643736233 | OSBPL3     | -1.868379461 |
| 40244      | 2.652651895 | C22orf9    | -1.86573247  |
| WARS       | 2.66493734  | BRAP       | -1.859789718 |
| SLC2A3     | 2.669175155 | LGALS8     | -1.85409034  |
| PTPN11     | 2.673518038 | DDX11      | -1.85255313  |
| GALC       | 2.682328119 | MARK4      | -1.843159506 |
| CD58       | 2.73750339  | GGCX       | -1.84262695  |
| RECQL      | 2.752685932 | TWF1       | -1.84262695  |
| G3BP1      | 2.780268474 | HLA-DRB1   | -1.834673223 |
| ABAT       | 2.78670547  | TNKS       | -1.828295101 |
| TSR1       | 2.822777229 | TYRO3      | -1.826103461 |
| UBL3       | 2.823008284 | MEA1       | -1.817924919 |
| SLC1A7     | 2.836304945 | SYDE1      | -1.817017726 |
| AGPAT3     | 2.843665413 | NF1        | -1.814092922 |

Supplemental Table 2 - Genes Identified by RFC as mediators of AML cell fate in cytarabine

| MV4-11     |             | Molm13     |              |
|------------|-------------|------------|--------------|
| GeneSymbol | log2nFC     | GeneSymbol | log2nFC      |
| RCVRN      | 2.855496609 | UQCRH      | -1.813783252 |
| PCBP2      | 2.863963168 | MYOF       | -1.804025852 |
| DUS4L      | 2.876403572 | PIK3CG     | -1.800557767 |
| SDC2       | 2.905502467 | C10orf28   | -1.79877187  |
| TFPI       | 2.912247936 | BCORL1     | -1.7949129   |
| STAG2      | 2.919861811 | MLL2       | -1.789765809 |
| RDX        | 2.935675181 | DDX3X      | -1.780497247 |
| IKBKB      | 2.959238887 | SLC35D2    | -1.773470637 |
| TMX1       | 2.967268971 | STK19      | -1.768718488 |
| ZFYVE9     | 2.983857633 | MYO1B      | -1.767697609 |
| ARG2       | 3.05656463  | MON1B      | -1.762955417 |
| CD46       | 3.066688332 | COL4A3     | -1.762708644 |
| GNRHR      | 3.071330204 | AP1S1      | -1.757370335 |
| PPP3CA     | 3.087919793 | ISG20      | -1.747813624 |
| NF1        | 3.111420549 | NAT8B      | -1.743502326 |
| DAZ1       | 3.193781499 | MAP3K7     | -1.738901379 |
| DAZ2       | 3.193781499 | B2M        | -1.735466483 |
| DAZ3       | 3.193781499 | POMGNT1    | -1.734983511 |
| DAZ4       | 3.193781499 | C20orf7    | -1.730017709 |
| PTAFR      | 3.226803109 | ELL3       | -1.725556888 |
| BBS10      | 3.353364643 | GMDS       | -1.725099644 |
| BLVRA      | 3.376738098 | G6PD       | -1.720408241 |
| PPARGC1B   | 3.387845626 | PPAP2B     | -1.71896314  |
| PLXNC1     | 3.436268401 | IDS        | -1.714783342 |
| RALA       | 3.544785987 | COX4I1     | -1.714376901 |
| DST        | 3.552210257 | VBP1       | -1.712950045 |
| BANK1      | 3.558656576 | HS6ST1     | -1.709001983 |
| PAFAH1B1   | 3.56408249  | PRB3       | -1.709001983 |
| NUP107     | 3.697902402 | PRB4       | -1.709001983 |
| TLE1       | 3.73414682  | SNAP23     | -1.707851986 |
| MAGEB4     | 3.819826588 | CES2       | -1.706466956 |
| CUL5       | 3.939217845 | CREB1      | -1.703763625 |
| GATAD1     | 4.369497396 | MAK10      | -1.700644681 |
| ITSN1      | 4.41709597  | SLC13A3    | -1.700581863 |
| AFF1       | 4.680787332 | CBLB       | -1.699517743 |
| NFATC2IP   | 4.781172419 | BAD        | -1.685263033 |
| OLFML1     | 4.781172419 | DCUN1D4    | -1.685029889 |
| MAPK9      | 4.943302066 | CNTNAP2    | -1.677663061 |
| STRN3      | 5.03175276  | FAM21A     | -1.669318817 |
| SMC3       | 6.227046921 | PPP1R10    | -1.668780789 |
|            |             | PDE4D      | -1.66224714  |
|            |             | DBT        | -1.656288868 |
|            |             | STS        | -1.655798653 |
|            |             | GSK3B      | -1.64925125  |
|            |             | DLX6       | -1.646842671 |
|            |             | SUMO2      | -1.645346639 |
|            |             | DUS4L      | -1.633718524 |
|            |             | H3F3B      | -1.63102055  |
|            |             | WARS2      | -1.629755632 |
|            |             | PCDHGA11   | -1.629283084 |
|            |             | RPL13      | -1.627907294 |
|            |             | SOCS1      | -1.617193927 |
|            |             | SLC26A2    | -1.5958358   |
|            |             | ARSF       | -1.577347338 |
|            |             | HMGA2      | 1.606109773  |
|            |             | RINT1      | 1.640837441  |
|            |             | PRKCI      | 1.649832121  |
|            |             | NUCB1      | 1.670521381  |
|            |             | ZFPL1      | 1.674995596  |
|            |             | HGF        | 1.676575717  |
|            |             | MAP2K2     | 1.680986497  |
|            |             | ME2        | 1.69151394   |
|            |             | COL4A3     | 1.697608231  |
|            |             | C3orf1     | 1.701451674  |
|            |             | H2AFZ      | 1.722095155  |
|            |             | DDX17      | 1.750206458  |
|            |             | RAB3GAP1   | 1.767386127  |

Supplemental Table 2 - Genes Identified by RFC as mediators of AML cell fate in cytarabine

| MV4-11     |         | Molm13     |             |
|------------|---------|------------|-------------|
| GeneSymbol | log2nFC | GeneSymbol | log2nFC     |
|            |         | COMMD10    | 1.767629811 |
|            |         | MLLT4      | 1.778082499 |
|            |         | PLCB1      | 1.811205235 |
|            |         | TCL6       | 1.826255127 |
|            |         | MED31      | 1.833778995 |
|            |         | EIF1AY     | 1.836843383 |
|            |         | EPHB4      | 1.837216866 |
|            |         | MED13L     | 1.838738836 |
|            |         | EIF5B      | 1.843468122 |
|            |         | ZNF238     | 1.859106134 |
|            |         | RANBP9     | 1.861146532 |
|            |         | C1orf89    | 1.870854634 |
|            |         | RPL13      | 1.875640889 |
|            |         | IKBKB      | 1.876090065 |
|            |         | CLN5       | 1.880024803 |
|            |         | ATRX       | 1.883138935 |
|            |         | TBC1D22B   | 1.891930483 |
|            |         | SOX9       | 1.894011444 |
|            |         | AKAP13     | 1.904457404 |
|            |         | CYP2B6     | 1.904468591 |
|            |         | IL1RN      | 1.906069966 |
|            |         | MMP11      | 1.909074003 |
|            |         | SULF1      | 1.911712113 |
|            |         | SYNCRIP    | 1.917529446 |
|            |         | FTSJ1      | 1.919516003 |
|            |         | PATZ1      | 1.923790603 |
|            |         | GRSF1      | 1.926416563 |
|            |         | ZFP64      | 1.92752836  |
|            |         | TPD52L1    | 1.930699138 |
|            |         | DERL1      | 1.937787411 |
|            |         | SEPT10     | 1.941527829 |
|            |         | FTSJD2     | 1.970546057 |
|            |         | CPVL       | 1.977931966 |
|            |         | USP11      | 1.979904654 |
|            |         | SUSD4      | 1.982859173 |
|            |         | DHRS7      | 1.983862805 |
|            |         | RPRD1A     | 1.986139591 |
|            |         | TREM1      | 1.991406075 |
|            |         | CAND1      | 1.99152933  |
|            |         | MAP4       | 1.994333375 |
|            |         | GCOM1      | 2.003832829 |
|            |         | GRINL1A    | 2.003832829 |
|            |         | C16orf35   | 2.01139864  |
|            |         | NOP14      | 2.012802216 |
|            |         | ADAM7      | 2.016476564 |
|            |         | POU3F1     | 2.029394796 |
|            |         | RTF1       | 2.03102785  |
|            |         | RPN2       | 2.03402226  |
|            |         | C6orf62    | 2.035045813 |
|            |         | FMR1       | 2.035687828 |
|            |         | DHX57      | 2.036098513 |
|            |         | ACN9       | 2.036585508 |
|            |         | HLA-DRA    | 2.042952145 |
|            |         | SLCO2B1    | 2.047044776 |
|            |         | PEX6       | 2.0473455   |
|            |         | EBP        | 2.053173863 |
|            |         | BHLHE40    | 2.053887145 |
|            |         | LRP8       | 2.054027209 |
|            |         | OTUD6B     | 2.059907975 |
|            |         | PLD1       | 2.062083729 |
|            |         | FGFR2      | 2.078234487 |
|            |         | ITCH       | 2.080608739 |
|            |         | TNFRSF19   | 2.089802745 |
|            |         | NFYB       | 2.103668006 |
|            |         | RNF160     | 2.113198978 |
|            |         | GPR89B     | 2.120335841 |
|            |         | CD44       | 2.122502308 |

Supplemental Table 2 - Genes Identified by RFC as mediators of AML cell fate in cytarabine

| MV4-11     |         | Molm13     |             |
|------------|---------|------------|-------------|
| GeneSymbol | log2nFC | GeneSymbol | log2nFC     |
|            |         | RPLP2      | 2.125936835 |
|            |         | HNRNPD     | 2.132078101 |
|            |         | TANK       | 2.13627489  |
|            |         | LPHN1      | 2.149581483 |
|            |         | TMEM48     | 2.154289221 |
|            |         | TNFRSF25   | 2.165016485 |
|            |         | CADM4      | 2.179779482 |
|            |         | GPLD1      | 2.183531008 |
|            |         | TRIOBP     | 2.187225089 |
|            |         | UBE2L3     | 2.219415876 |
|            |         | RBM22      | 2.238682309 |
|            |         | SGCD       | 2.239344189 |
|            |         | FAR1       | 2.240249654 |
|            |         | RER1       | 2.249819075 |
|            |         | ABCC9      | 2.254987046 |
|            |         | WAPAL      | 2.265463816 |
|            |         | NADK       | 2.276124168 |
|            |         | CREBZF     | 2.277408356 |
|            |         | UBE3A      | 2.302957826 |
|            |         | FCRL4      | 2.305523389 |
|            |         | GNPTAB     | 2.328799298 |
|            |         | COL3A1     | 2.332862892 |
|            |         | FREQ       | 2.336747119 |
|            |         | HNRNPK     | 2.342843778 |
|            |         | TRAPPC4    | 2.34427559  |
|            |         | PURA       | 2.345551794 |
|            |         | SYNE2      | 2.356826357 |
|            |         | CEP170     | 2.357337237 |
|            |         | DR1        | 2.374353033 |
|            |         | C4orf16    | 2.377492898 |
|            |         | ARFIP1     | 2.380052401 |
|            |         | EPHB2      | 2.381489602 |
|            |         | AQP1       | 2.390193508 |
|            |         | SLC6A8     | 2.400024611 |
|            |         | ENOX2      | 2.400818231 |
|            |         | KSR1       | 2.403579407 |
|            |         | GTSE1      | 2.415325113 |
|            |         | PAX8       | 2.422600595 |
|            |         | SLC2A3     | 2.424558981 |
|            |         | AXL        | 2.424879443 |
|            |         | IMPG1      | 2.431027346 |
|            |         | CCNL1      | 2.435580695 |
|            |         | PLEKHA3    | 2.437517468 |
|            |         | TBX5       | 2.451990333 |
|            |         | CACYBP     | 2.461556488 |
|            |         | LPIN1      | 2.514485282 |
|            |         | DNAJB12    | 2.528961359 |
|            |         | PDLIM5     | 2.536805398 |
|            |         | CSTF2T     | 2.540662879 |
|            |         | EDA        | 2.544368556 |
|            |         | RYK        | 2.547665621 |
|            |         | U2AF2      | 2.547665621 |
|            |         | INTS12     | 2.579635281 |
|            |         | PIAS2      | 2.585688797 |
|            |         | C12orf49   | 2.606351566 |
|            |         | TPT1       | 2.616700081 |
|            |         | KPNA1      | 2.622478109 |
|            |         | AFF3       | 2.622724101 |
|            |         | NEB        | 2.651192457 |
|            |         | RUNX1      | 2.65171588  |
|            |         | DNAJC12    | 2.68493713  |
|            |         | DIAPH1     | 2.69343259  |
|            |         | HNRPDL     | 2.695843243 |
|            |         | LPGAT1     | 2.705950151 |
|            |         | OSBPL9     | 2.721378373 |
|            |         | SSX3       | 2.725390067 |
|            |         | UNC5C      | 2.733526006 |

Supplemental Table 2 - Genes Identified by RFC as mediators of AML cell fate in cytarabine

| MV4-11     |         | Molm13     |             |
|------------|---------|------------|-------------|
| GeneSymbol | log2nFC | GeneSymbol | log2nFC     |
|            |         | YTHDF3     | 2.738263888 |
|            |         | PSMC1      | 2.738702526 |
|            |         | FMN2       | 2.769729142 |
|            |         | TTC22      | 2.788525847 |
|            |         | HSFY1      | 2.793589809 |
|            |         | MEF2C      | 2.887627652 |
|            |         | USP25      | 2.904563497 |
|            |         | PIGR       | 2.905724599 |
|            |         | CCDC25     | 2.918516712 |
|            |         | LPCAT2     | 2.94098671  |
|            |         | SKI        | 2.960191516 |
|            |         | CYBB       | 2.982527054 |
|            |         | TRIM33     | 3.146404622 |
|            |         | TPM4       | 3.148437705 |
|            |         | RPS6       | 3.152577679 |
|            |         | RSBN1      | 3.259271686 |
|            |         | ZSCAN5A    | 3.277551555 |
|            |         | ANXA4      | 3.33773027  |
|            |         | ABHD6      | 3.404412763 |
|            |         | FANCA      | 3.439807984 |
|            |         | FBXO11     | 3.44885006  |
|            |         | HNRNPH1    | 3.698962083 |
|            |         | ALS2CR11   | 3.886941873 |
|            |         | GPR125     | 3.95567872  |

### Supplemental Table 3 - Mediators of AML cell fate in cytarabine (BINGS RFC overlap)

#### Genes which confer Chemosensitivity when knocked down

|           |          |         |
|-----------|----------|---------|
| ABCC4     | KIAA1012 | SFRP1   |
| ABCE1     | KIAA1033 | SKP1    |
| ACVR1B    | KIR2DL1  | SLC1A2  |
| ADAMTS5   | KIR2DL2  | SLC26A1 |
| ANAPC5    | KRT33B   | SMOX    |
| ANKRD28   | LRRC25   | SMPD1   |
| ARHGAP11A | LRRC8E   | SNTB2   |
| ARSD      | LYRM7    | SPRED2  |
| ATF5      | MAP3K8   | STC1    |
| ATP6V1A   | MAPK8IP3 | SULT1A2 |
| BBS9      | MAT2A    | TAF4    |
| C1orf149  | MDGA2    | TIMP3   |
| C1S       | MED21    | TMEM87A |
| C4orf18   | MFF      | TMEM97  |
| C9orf5    | MLL      | TRPC1   |
| CACNG6    | MTSS1    | TUBB1   |
| CACYBP    | MYO7A    | UBA5    |
| CAST      | NBN      | UBE3A   |
| CCHCR1    | NBS      | VCL     |
| CDH12     | NCOA2    | WAC     |
| CHAF1A    | NDE1     | WEE1    |
| CLDN20    | NEK3     | XPA     |
| CLIC5     | NPAS2    | ZBTB7A  |
| CNTNAP2   | NRG1     | ZFP42   |
| COX15     | OR4D2    | ZNF396  |
| CPE       | PAFAH1B3 |         |
| CPNE4     | PAQR6    |         |
| CREBZF    | PBX2     |         |
| DCLRE1B   | PDE4D    |         |
| DCP2      | PHYH     |         |
| DLX4      | PIP5K3   |         |
| DOCK9     | POLR2C   |         |
| DTNA      | PPP3CA   |         |
| EFR3A     | PRKCA    |         |
| FGA       | PTBP1    |         |
| FHL1      | PTPRR    |         |
| FKBP1A    | RAD17    |         |
| FN1       | RAD18    |         |
| FUSIP1    | RAD52    |         |
| FUT6      | RBBP6    |         |
| GOLGA2    | REEP1    |         |
| GTF2I     | RIC3     |         |
| H3F3B     | RICS     |         |
| HSBP1     | RMND1    |         |
| HSP90AA1  | RRAGA    |         |
| IDH3A     | RUNX2    |         |
| IFIT5     | RWDD2A   |         |
| ITGB3     | SAFB     |         |
| ITGB8     | SCRN3    |         |
| KCNJ15    | SETDB1   |         |

### Supplemental Table 3 - Mediators of AML cell fate in cytarabine (BINGS RFC overlap)

#### Genes which confer Chemoresistance when knocked down

|          |          |          |         |
|----------|----------|----------|---------|
| ABAT     | ENOX2    | PDLIM5   | TRAPPC4 |
| ABCC9    | EPHB2    | PIAS2    | TREM1   |
| ABHD6    | FANCA    | PIGR     | TRIM33  |
| ACTR3    | FAR1     | PIP4K2A  | TRIOBP  |
| AFF1     | FBXO11   | PKP4     | TSR1    |
| AFF3     | FCRL4    | PLEKHA3  | TTC22   |
| AGPAT3   | FGFR2    | PLXNC1   | TUBB    |
| ALS2CR11 | FMN2     | PPARGC1B | U2AF2   |
| ANXA4    | FYB      | PPP3CA   | UBE2L3  |
| AQP1     | G3BP1    | PSMC1    | UBL3    |
| ARFIP1   | GATAD1   | PTPN11   | UNC5C   |
| ARG2     | GNPTAB   | PURA     | USP25   |
| AXL      | GNRHR    | RALA     | WAPAL   |
| BANK1    | GPR125   | RBM22    | YTHDF3  |
| BBS10    | GPR89B   | RCHY1    | ZC3H11A |
| BHLHE40  | GRSF1    | RDX      | ZFP64   |
| BLVRA    | GTSE1    | RECQL    | ZSCAN5A |
| C4orf16  | HLA-DRA  | RNF160   |         |
| C6orf106 | HNRNPD   | RPL13    |         |
| CACYBP   | HNRNPH1  | RPRD1A   |         |
| CADM4    | HNRNPK   | RPS6     |         |
| CAND1    | HNRPDL   | RRS1     |         |
| CCDC25   | HSFY1    | RSBN1    |         |
| CCNL1    | IKBKB    | RUNX1    |         |
| CD44     | IMPG1    | RYK      |         |
| CD46     | INTS12   | SDC2     |         |
| CD58     | ITSN1    | SELENBP1 |         |
| CD93     | KPNA1    | SGCD     |         |
| CEP170   | KSR1     | SKI      |         |
| CLASP2   | LPCAT2   | SLC2A3   |         |
| CLEC1A   | LPGAT1   | SLC6A6   |         |
| CPNE3    | LPHN1    | SLC6A8   |         |
| CREBZF   | LPIN1    | SLCO2B1  |         |
| CSTF2T   | MAGEB4   | SMC3     |         |
| CUL5     | MAP4     | SPON1    |         |
| CYB5A    | MAPK9    | SRPK2    |         |
| CYBB     | MEF2C    | SSX3     |         |
| DAZ1     | MMP11    | STAG2    |         |
| DAZ2     | NADK     | STRN3    |         |
| DAZ3     | NDFIP1   | SYNE2    |         |
| DAZ4     | NEB      | SYPL1    |         |
| DHPS     | NF1      | TBX5     |         |
| DHX57    | NFATC2IP | TCL6     |         |
| DIAPH1   | NFYB     | TFPI     |         |
| DNAJB12  | NOP14    | TLE1     |         |
| DNAJC12  | NUP107   | TMEM48   |         |
| DPT      | OLFML1   | TMX1     |         |
| DR1      | OSBPL9   | TNFRSF19 |         |
| DST      | PAFAH1B1 | TNFRSF25 |         |
| DUS4L    | PAX8     | TPM4     |         |
| EDA      | PCDHGA11 | TPT1     |         |

### Supplemental Table 4 - Top Molecular and Cellular Function from Functional Genetic Screening- Cell cycle

| Category   | Functions Annotation                                  | p-Value  | Molecules                                                                                                                                                                             | # Molecules |
|------------|-------------------------------------------------------|----------|---------------------------------------------------------------------------------------------------------------------------------------------------------------------------------------|-------------|
| Cell Cycle | entry into G2 phase of eukaryotic cells               | 7.16E-06 | MAP3K8, RUNX2, WEE1                                                                                                                                                                   | 3           |
| Cell Cycle | cell division process                                 | 2.74E-05 | ACVR1B, ANAPC5, ATF5, CAST, CHAF1A, DCLRE1B, FKBP1A, FN1, GOLGA2, GTF2I, HSP90AA1, MAP3K8, MLL, NBN, NDE1, NRG1, PIKFYVE, PPP3CA, PRKCA, RAD17, RAD18, RAD52, RUNX2, TUBB1, WEE1, XPA | 26          |
| Cell Cycle | entry into interphase of endothelial cells            | 5.14E-05 | FN1, RUNX2                                                                                                                                                                            | 2           |
| Cell Cycle | G2 phase                                              | 6.42E-05 | ANAPC5, ATF5, MAP3K8, NBN, NRG1, RAD17, RUNX2, WEE1                                                                                                                                   | 8           |
| Cell Cycle | interphase                                            | 9.31E-05 | ACVR1B, ANAPC5, ATF5, FN1, GTF2I, MAP3K8, NBN, NRG1, PPP3CA, PRKCA, RAD17, RAD18, RUNX2, WEE1                                                                                         | 14          |
| Cell Cycle | entry into G2/M phase of eukaryotic cells             | 1.53E-04 | RUNX2, WEE1                                                                                                                                                                           | 2           |
| Cell Cycle | entry into interphase of cell lines                   | 1.58E-04 | FN1, GTF2I, MAP3K8, NRG1, WEE1                                                                                                                                                        | 5           |
| Cell Cycle | entry into interphase of eukaryotic cells             | 2.00E-04 | FN1, GTF2I, MAP3K8, NRG1, RUNX2, WEE1                                                                                                                                                 | 6           |
| Cell Cycle | entry into G2 phase of cell lines                     | 3.06E-04 | MAP3K8, WEE1                                                                                                                                                                          | 2           |
| Cell Cycle | cell stage                                            | 3.64E-04 | ACVR1B, ANAPC5, ATF5, FN1, GOLGA2, GTF2I, HSP90AA1, MAP3K8, NBN, NDE1, NRG1, PPP3CA, PRKCA, RAD17, RAD18, RUNX2, TUBB1, WEE1                                                          | 18          |
| Cell Cycle | cell division process of eukaryotic cells             | 6.26E-04 | ATF5, CAST, FN1, GOLGA2, GTF2I, MAP3K8, MLL, NBN, NDE1, NRG1, PIKFYVE, PRKCA, RAD17, RAD18, RUNX2, WEE1, XPA                                                                          | 17          |
| Cell Cycle | arrest in cell division process                       | 6.55E-04 | ATF5, FKBP1A, FN1, GOLGA2, GTF2I, HSP90AA1, MLL, NBN, NRG1, PRKCA, RAD18, WEE1                                                                                                        | 12          |
| Cell Cycle | G2 phase of eukaryotic cells                          | 7.81E-04 | ATF5, MAP3K8, NRG1, RAD17, RUNX2, WEE1                                                                                                                                                | 6           |
| Cell Cycle | interphase of cell lines                              | 8.14E-04 | ATF5, FN1, GTF2I, MAP3K8, NRG1, PRKCA, RAD17, RAD18, RUNX2, WEE1                                                                                                                      | 10          |
| Cell Cycle | interphase of eukaryotic cells                        | 8.86E-04 | ATF5, FN1, GTF2I, MAP3K8, NBN, NRG1, PRKCA, RAD17, RAD18, RUNX2, WEE1                                                                                                                 | 11          |
| Cell Cycle | cell division process of cell lines                   | 9.60E-04 | ATF5, CAST, FN1, GOLGA2, GTF2I, MAP3K8, MLL, NRG1, PIKFYVE, PRKCA, RAD17, RAD18, RUNX2, WEE1                                                                                          | 14          |
| Cell Cycle | arrest in cell stage of eukaryotic cells              | 1.00E-03 | ATF5, FN1, GOLGA2, GTF2I, NBN, NRG1, PRKCA, RAD18, WEE1                                                                                                                               | 9           |
| Cell Cycle | G2/M phase of colon cancer cell lines                 | 1.05E-03 | RAD17, WEE1                                                                                                                                                                           | 2           |
| Cell Cycle | cell stage of eukaryotic cells                        | 1.06E-03 | ATF5, FN1, GOLGA2, GTF2I, MAP3K8, NBN, NDE1, NRG1, PRKCA, RAD17, RAD18, RUNX2, WEE1                                                                                                   | 13          |
| Cell Cycle | checkpoint control                                    | 1.23E-03 | DCLRE1B, NBN, RAD17, RAD18                                                                                                                                                            | 4           |
| Cell Cycle | entry into S phase of cell lines                      | 1.30E-03 | FN1, GTF2I, MAP3K8, NRG1                                                                                                                                                              | 4           |
| Cell Cycle | cell stage of cell lines                              | 1.36E-03 | ATF5, FN1, GOLGA2, GTF2I, MAP3K8, NRG1, PRKCA, RAD17, RAD18, RUNX2, WEE1                                                                                                              | 11          |
| Cell Cycle | arrest in S phase of eukaryotic cells                 | 1.55E-03 | GTF2I, NBN, RAD18                                                                                                                                                                     | 3           |
| Cell Cycle | arrest in cell division process of eukaryotic cells   | 1.76E-03 | ATF5, FN1, GOLGA2, GTF2I, MLL, NBN, NRG1, PRKCA, RAD18, WEE1                                                                                                                          | 10          |
| Cell Cycle | G2 phase of cell lines                                | 1.82E-03 | ATF5, MAP3K8, NRG1, RAD17, WEE1                                                                                                                                                       | 5           |
| Cell Cycle | G2/M phase transition                                 | 1.89E-03 | ANAPC5, ATF5, MAP3K8, NRG1                                                                                                                                                            | 4           |
| Cell Cycle | arrest in interphase of eukaryotic cells              | 2.16E-03 | ATF5, FN1, GTF2I, NBN, NRG1, PRKCA, RAD18, WEE1                                                                                                                                       | 8           |
| Cell Cycle | G2/M phase transition of cell lines                   | 2.55E-03 | ATF5, MAP3K8, NRG1                                                                                                                                                                    | 3           |
| Cell Cycle | S phase checkpoint control of cell lines              | 2.71E-03 | RAD17, RAD18                                                                                                                                                                          | 2           |
| Cell Cycle | S phase of eukaryotic cells                           | 2.87E-03 | FN1, GTF2I, MAP3K8, NBN, NRG1, RAD18                                                                                                                                                  | 6           |
| Cell Cycle | G2/M phase                                            | 3.03E-03 | NBN, RAD17, RUNX2, WEE1                                                                                                                                                               | 4           |
| Cell Cycle | S phase of cell lines                                 | 3.42E-03 | FN1, GTF2I, MAP3K8, NRG1, RAD18                                                                                                                                                       | 5           |
| Cell Cycle | exit from cell division process of eukaryotic cells   | 3.64E-03 | GTF2I, PRKCA, RUNX2                                                                                                                                                                   | 3           |
| Cell Cycle | G2 phase of tumor cell lines                          | 4.05E-03 | ATF5, NRG1, RAD17, WEE1                                                                                                                                                               | 4           |
| Cell Cycle | arrest in G2 phase of breast cancer cell lines        | 4.42E-03 | NRG1, WEE1                                                                                                                                                                            | 2           |
| Cell Cycle | exit from interphase of eukaryotic cells              | 5.08E-03 | GTF2I, RUNX2                                                                                                                                                                          | 2           |
| Cell Cycle | arrest in cell stage of cell lines                    | 6.22E-03 | ATF5, GOLGA2, GTF2I, NRG1, PRKCA, RAD18, WEE1                                                                                                                                         | 7           |
| Cell Cycle | arrest in cell division process of cell lines         | 6.49E-03 | ATF5, GOLGA2, GTF2I, MLL, NRG1, PRKCA, RAD18, WEE1                                                                                                                                    | 8           |
| Cell Cycle | arrest in G0/G1 phase transition of breast cell lines | 7.20E-03 | PRKCA                                                                                                                                                                                 | 1           |



## Supplemental Table 4 - Top Molecular and Cellular Function from Functional Genetic Screening- Cell cycle

| Category   | Functions Annotation                                                | p-Value  | Molecules                                                                                      | # Molecules |
|------------|---------------------------------------------------------------------|----------|------------------------------------------------------------------------------------------------|-------------|
| Cell Cycle | arrest in G0/G1 phase transition of epithelial cell lines           | 7.20E-03 | PRKCA                                                                                          | 1           |
| Cell Cycle | arrest in G2/M phase transition of hepatoma cell lines              | 7.20E-03 | ATF5                                                                                           | 1           |
| Cell Cycle | arrest in cell cycle progression of intestinal cell lines           | 7.20E-03 | PRKCA                                                                                          | 1           |
| Cell Cycle | arrest in mid-G1 phase of microvascular endothelial cells           | 7.20E-03 | FN1                                                                                            | 1           |
| Cell Cycle | delay in G1 phase of bone cell lines                                | 7.20E-03 | RUNX2                                                                                          | 1           |
| Cell Cycle | delay in G2 phase of breast cancer cell lines                       | 7.20E-03 | NRG1                                                                                           | 1           |
| Cell Cycle | entry into G1/S phase transition of microvascular endothelial cells | 7.20E-03 | FN1                                                                                            | 1           |
| Cell Cycle | entry into G2/M phase of colon cancer cell lines                    | 7.20E-03 | WEE1                                                                                           | 1           |
| Cell Cycle | entry into G2/M phase of endothelial cells                          | 7.20E-03 | RUNX2                                                                                          | 1           |
| Cell Cycle | entry into G2/M phase transition of leukocyte cell lines            | 7.20E-03 | MAP3K8                                                                                         | 1           |
| Cell Cycle | exit from G2/M phase of endothelial cells                           | 7.20E-03 | RUNX2                                                                                          | 1           |
| Cell Cycle | exit from cell cycle progression of enterocytes                     | 7.20E-03 | PRKCA                                                                                          | 1           |
| Cell Cycle | propagation of mitosis of neurons                                   | 7.20E-03 | NDE1                                                                                           | 1           |
| Cell Cycle | re-entry into cell division process                                 | 8.82E-03 | CAST, FN1, NRG1                                                                                | 3           |
| Cell Cycle | exit from cell division process of normal cells                     | 8.97E-03 | PRKCA, RUNX2                                                                                   | 2           |
| Cell Cycle | G2/M phase of eukaryotic cells                                      | 9.67E-03 | RAD17, RUNX2, WEE1                                                                             | 3           |
| Cell Cycle | cell cycle progression                                              | 9.86E-03 | CAST, CHAF1A, FKBP1A, GOLGA2, HSP90AA1, MLL, NBN, NDE1, NRG1, PIKFYVE, PRKCA, TUBB1, WEE1, XPA | 14          |
| Cell Cycle | G1/S phase transition                                               | 1.14E-02 | ACVR1B, FN1, NBN, NRG1, PPP3CA                                                                 | 5           |
| Cell Cycle | arrest in S phase of cell lines                                     | 1.38E-02 | GTF2I, RAD18                                                                                   | 2           |
| Cell Cycle | assembly of mitotic spindle                                         | 1.38E-02 | NDE1, TUBB1                                                                                    | 2           |
| Cell Cycle | mitosis                                                             | 1.42E-02 | GOLGA2, HSP90AA1, NBN, NDE1, NRG1, PRKCA, TUBB1, WEE1                                          | 8           |
| Cell Cycle | S phase checkpoint control of carcinoma cell lines                  | 1.44E-02 | RAD17                                                                                          | 1           |
| Cell Cycle | S phase checkpoint control of lung cancer cell lines                | 1.44E-02 | RAD17                                                                                          | 1           |
| Cell Cycle | arrest in G2/M phase transition of ovarian cancer cell lines        | 1.44E-02 | NRG1                                                                                           | 1           |
| Cell Cycle | arrest in S phase of fibroblasts                                    | 1.44E-02 | NBN                                                                                            | 1           |
| Cell Cycle | arrest in metaphase of cervical cancer cell lines                   | 1.44E-02 | GOLGA2                                                                                         | 1           |
| Cell Cycle | cell cycle progression of bladder cancer cell lines                 | 1.44E-02 | PIKFYVE                                                                                        | 1           |
| Cell Cycle | entry into mitosis of breast cancer cell lines                      | 1.44E-02 | NRG1                                                                                           | 1           |
| Cell Cycle | exit from S phase of fibroblast cell lines                          | 1.44E-02 | GTF2I                                                                                          | 1           |

**Supplemental Table 5 - Differentially expressed genes in AML cells exposed to cytarabine**

| <b>GENE</b>     | <b>FC</b> | <b>GENE</b>     | <b>FC</b> |
|-----------------|-----------|-----------------|-----------|
| DPYD            | 1.358273  | CAB39           | 1.192618  |
| ENST00000258817 | 1.191148  | ENST00000408656 | 1.108001  |
| SNX4            | 1.225983  | N4BP2L1         | 1.389736  |
| SLC35F1         | 1.289602  | C3ORF23         | 1.440722  |
| ATAD1           | 1.163746  | TRAF3IP3        | 1.310977  |
| HGSNAT          | 1.381167  | TMEM63A         | 1.32937   |
| ATP10D          | 1.361045  | PIGT            | 1.106553  |
| RPN1            | 1.106393  | MPZ             | 1.315408  |
| ZMYM4           | 1.153256  | IL1RAP          | 1.23008   |
| GOLGA2          | 1.314267  | ATP2B1          | 1.140538  |
| RAB3GAP1        | 1.133477  | PPM2C           | 1.237652  |
| PUM1            | 1.086046  | CALR            | 1.106744  |
| C2ORF30         | 1.300421  | DNAJC13         | 1.230565  |
| ENST00000390915 | 1.042245  | CASP3           | 1.148132  |
| AGTPBP1         | 1.235211  | UBE4A           | 1.122076  |
| MIB1            | 1.209681  | ARHGAP18        | 1.330156  |
| DRAM            | 1.347038  | YPEL2           | 1.449161  |
| AIM1            | 1.153657  | SNORA46         | 1.430257  |
| INTS6           | 1.30663   | IRF2            | 1.167137  |
| GYPE            | 1.164174  | FAM129A         | 1.24597   |
| CCR2            | 1.336057  | ARSB            | 1.239435  |
| TPMT            | 1.376244  | AKAP13          | 1.353334  |
| DNAJC3          | 1.342187  | SEC61B          | 1.104038  |
| JARID1B         | 1.117541  | GPR124          | 1.130809  |
| CRKRS           | 1.155387  | SIL1            | 1.321855  |
| DYNLT1          | 1.366088  | HERPUD2         | 1.285087  |
| USP32           | 1.210017  | SKAP2           | 1.265124  |
| SUPT6H          | 1.183724  | ZNF799          | 1.374353  |
| RWDD3           | 1.251011  | FMO4            | 1.168018  |
| PTPRM           | 1.194227  | C6ORF115        | 1.157281  |
| C20ORF197       | 1.462025  | FBXO11          | 1.163853  |
| ARCN1           | 1.109042  | NPHP3           | 1.212585  |
| ANXA7           | 1.20709   | CCDC126         | 1.097249  |
| C10ORF118       | 1.25692   | UTRN            | 1.338133  |
| UBE2D1          | 1.380564  | NFXL1           | 1.297365  |
| OSBPL8          | 1.241062  | PCNXL2          | 1.328678  |
| CHMP5           | 1.226297  | FAM124B         | 1.051543  |
| CFTR            | 1.160325  | ZYG11B          | 1.357676  |
| MNDA            | 1.493508  | C2ORF63         | 1.270345  |
| LMO7            | 1.529543  | RP5-1022P6.2    | 1.227     |
| TXNDC4          | 1.195619  | ICAM2           | 1.232856  |
| SNX14           | 1.396174  | FAM45A          | 1.187698  |
| FTHL3P          | 1.282283  | DDX42           | 1.109429  |
| RP1-19N1.1      | 1.230345  | FNIP1           | 1.227512  |
| ZNF548          | 1.161692  | XRN1            | 1.178814  |
| BAZ2A           | 1.149296  | GIT2            | 1.24266   |
| FAM127A         | 1.336858  | LPCAT2          | 1.328392  |
| LRMP            | 1.200475  | INPP4A          | 1.271118  |
| TMEM131         | 1.224066  | NLRC4           | 1.251696  |
|                 |           | CDC42SE2        | 1.153746  |
|                 |           | RPN2            | 1.105772  |

## Supplemental Table 5 - Differentially expressed genes in AML cells exposed to cytarabine

| GENE            | FC       | GENE            | FC       |
|-----------------|----------|-----------------|----------|
| ENST00000362636 | -1.13475 | SP2             | -1.2117  |
| ENST00000385944 | -1.12626 | ZNF793          | -1.14818 |
| RNPS1           | -1.06068 | DYDC1           | -1.08689 |
| TIAM2           | -1.13552 | ACO2            | -1.05768 |
| ENST00000331219 | -1.245   | GEMIN7          | -1.08616 |
| ENST00000364831 | -1.14721 | B4GALT2         | -1.24988 |
| SNORA10         | -1.25469 | FXN             | -1.39065 |
| C19ORF10        | -1.11474 | COX7A2          | -1.10059 |
| HSD17B10        | -1.12804 | LOC441795       | -1.26149 |
| CCL20           | -1.14375 | SCGB3A2         | -1.17102 |
| LOC646836       | -1.21386 | EIF4A1          | -1.18645 |
| EBPL            | -1.31061 | DTD1            | -1.26756 |
| RPS6KA2         | -1.60061 | SLITRK3         | -1.08219 |
| GNB2L1          | -1.06905 | DPY19L2P1       | -1.45233 |
| RNF187          | -1.16734 | SLC41A3         | -1.24233 |
| EFNA3           | -1.14972 | HSPBP1          | -1.2272  |
| MCF2            | -1.1182  | AADAACL2        | -1.15228 |
| C1ORF93         | -1.19723 | ARS2            | -1.21838 |
| OGDHL           | -1.14137 | MRPL53          | -1.15498 |
| TMEM141         | -1.22434 | CLEC6A          | -1.22012 |
| ENST00000384125 | -1.12412 | GBL             | -1.33276 |
| EIF5A           | -1.13455 | SF3A1           | -1.07026 |
| WDR46           | -1.43366 | TLR8            | -1.06182 |
| LOC348262       | -1.21018 | LOC100129858    | -1.2554  |
| RP1-21O18.1     | -1.07893 | NPHP4           | -1.13279 |
| ASS1            | -1.26679 | R3HCC1          | -1.18594 |
| EIF4B           | -1.11369 | MAP1S           | -1.06937 |
| LOC347292       | -1.1179  | ENST00000385400 | -1.11491 |
| HIST1H2BJ       | -1.31954 | STC2            | -1.3506  |
| COBRA1          | -1.17225 | ENST00000387273 | -1.07891 |
| ENST00000384310 | -1.06278 | COASY           | -1.27545 |
| LEMD1           | -1.15709 | NSUN5           | -1.29376 |
| GTPBP3          | -1.20888 | CCND2           | -1.2975  |
| UNC93B1         | -1.09493 | TFIP11          | -1.15037 |
| FGFBP1          | -1.29991 | TRAF2           | -1.20673 |
| BAT1            | -1.05838 | TBRG4           | -1.26301 |
| ENST00000410312 | -1.23272 | ENST00000387204 | -1.2244  |
| SPATA19         | -1.13955 | TMEM143         | -1.39955 |
| LOXL3           | -1.09815 | ENST00000386940 | -1.18842 |
| ENST00000410573 | -1.30833 | CHAC1           | -1.34119 |
| GOLGA2LY1       | -1.12243 | MPI             | -1.25002 |
| WBP11P1         | -1.11569 | RNF43           | -1.19427 |
| MGC45800        | -1.14776 | ENST00000407306 | -1.31086 |
| C2ORF16         | -1.1914  | ACTBL2          | -1.18539 |
| OR5AN1          | -1.25685 | UQCRO           | -1.17492 |
| C1ORF189        | -1.2505  | SLC35A4         | -1.0681  |
| AARSD1          | -1.20428 | WIT1            | -1.1546  |
| ENST00000324144 | -1.35362 | ENST00000384322 | -1.1253  |
| C9ORF150        | -1.11251 | FLJ00290        | -1.09461 |
| PRPF6           | -1.06923 |                 |          |
| TNS1            | -1.07962 |                 |          |

**Supplemental Figure 1. Top Molecular and biological functions represented by top differentially expressed genes exposed to ARA-C.** The top differentially expressed genes were subject to analysis by Ingenuity Pathways Analysis.

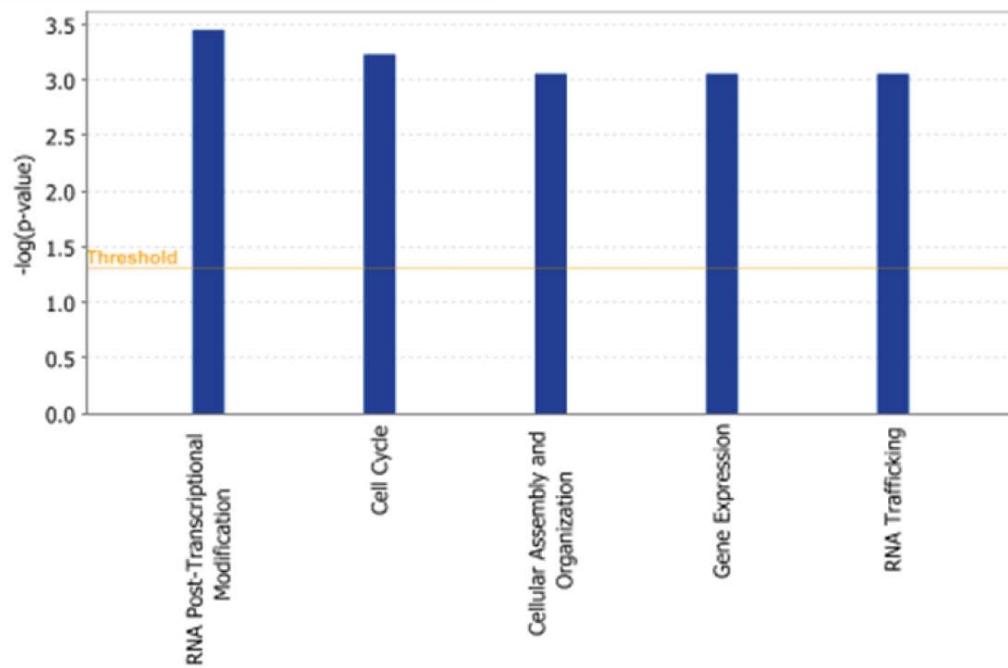

© 2000-2011 Ingenuity Systems, Inc. All rights reserved.

## Supplemental Figure 2. Pharmacologic inhibition of WEE1

**A. MK1775 alone has little effect on AML cell proliferation at concentrations below 100nM.** MV4-11 and Molm13 cells were seeded at  $2 \times 10^5$  cells/ml and treated with a WEE1 inhibitor, MK1775, at the indicated doses for 72 hours and counted by flow cytometry and propidium iodide exclusion. The concentration of live cells is depicted graphically. MK1775 has little effect on cellular proliferation at doses under 100nM.

**B. Inhibition of WEE1 with a small molecule unrelated to MK1775 sensitizes AML cells to cytarabine.** MV4-11 cells were treated with cytarabine and/or BCHCD for 72 hours and then counted by propidium iodide exclusion and flow cytometry. The number of live cells is depicted.

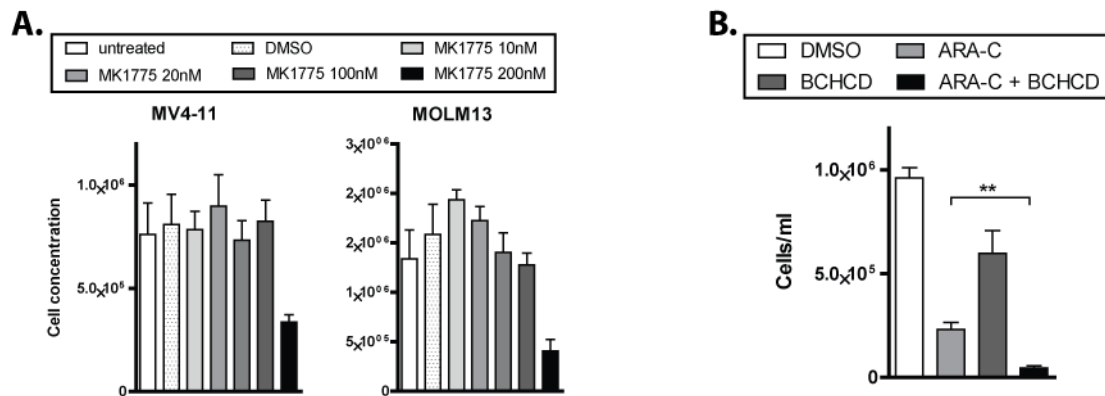

### Supplemental Figure 3. Cell cycle analyses.

**A & B. Assessment of cell cycle by DNA content shows large sub-G1 population, but little change with cytarabine and MK1775 among live cells.** MV4-11 cells were treated with DMSO, cytarabine 800nM, MK1775 200nM, or both for 72 hours, fixed and stained with propidium iodide and analyzed by flow cytometry.

**A.** Representative histograms are shown. Note dramatic increase in Sub-G1. **B.** The live cell population was analyzed for DNA content after exclusion of the Sub-G1 population.

**C. BrdU incorporation in cells in which WEE1 has been knocked down.** Molm13 cells transduced with a non-silencing sequence (sh $\Phi$ ) or an shRNA against WEE1 (shWEE1; as in Figure 5) were treated with cytarabine (12.5 nM), hydroxyurea (50 $\mu$ M) or left untreated for 48 hours, followed by exposure to BrdU for 1 hour. Cells were harvested, fixed and analyzed by flow cytometry as in Figure 6.

While the effects of HU and ARA-C were different at the doses tested, the S phase effects induced by cytarabine and HU are abrogated in cells in which WEE1 is knocked down. The percentage of BrdU<sup>+</sup> cells is shown (with mean fluorescence intensity).

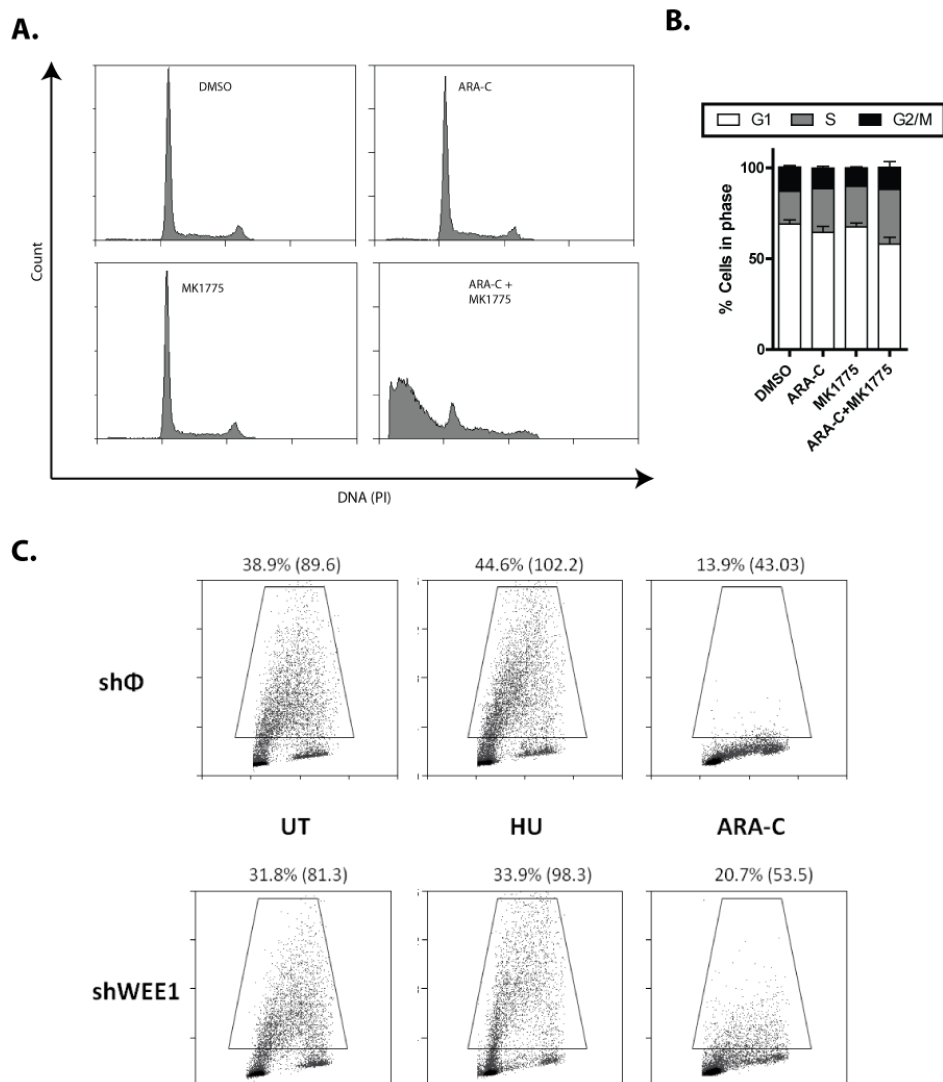

**Supplemental Figure 4. Inhibition of WEE1 sensitizes primary AML cells to cytarabine.**

**A. Two additional primary AML samples treated and analyzed as in Figure 7C.**

**B. Inhibition of WEE1 abrogates inhibitory phosphorylation of CDK2 induced by cytarabine.** Cells from primary AML sample number 7379 were subject to western blotting 72 hours after treatment with cytarabine (250nM) and/or MK1775 (250nM).

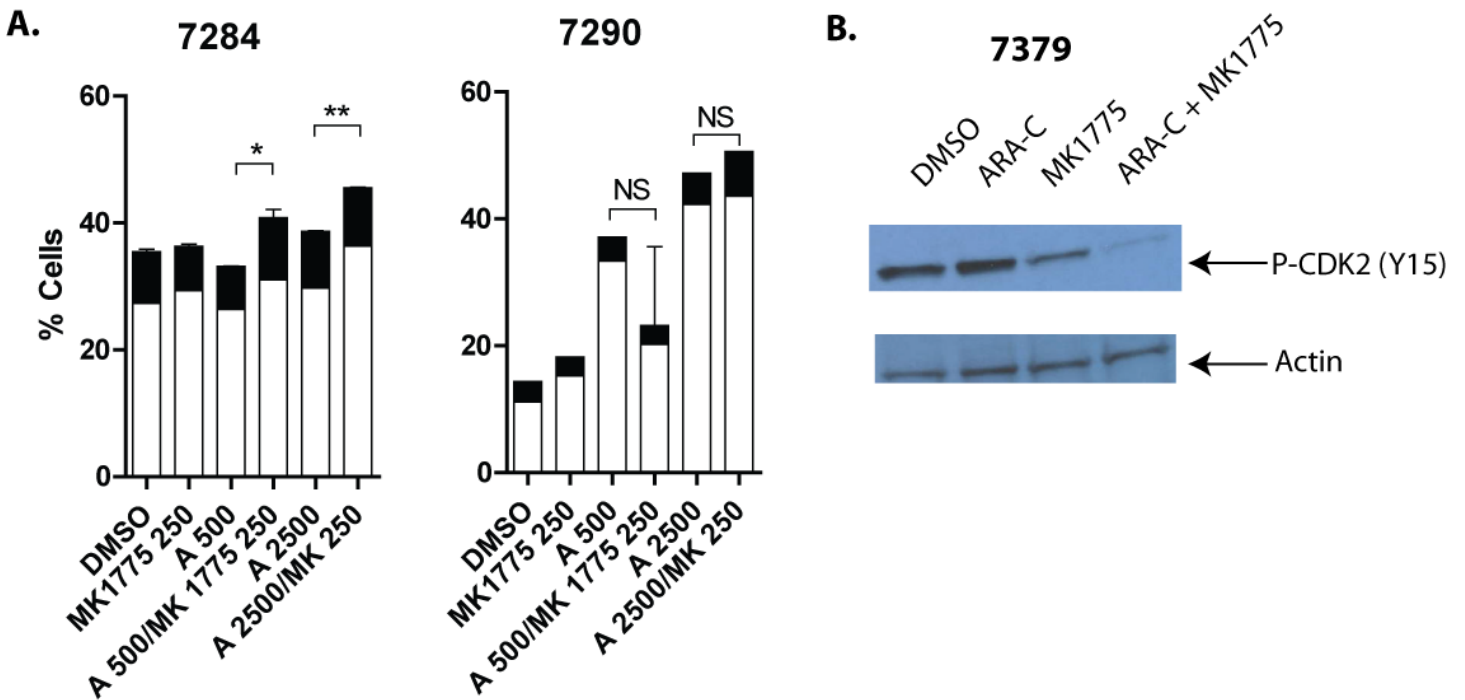

Supplement: NIHMS344879-supplement-1.pdf [file NIHMS344879-supplement-1.pdf]
